# Supplementary material for: Synthetic Strategies and Computational Inhibition Activity Study for Triazinyl-Substituted Benzenesulfonamide Conjugates with Polar and Hydrophobic Amino Acids as Inhibitors of Carbonic Anhydrases
Source: PubMed Central journal article supplement (PMC7279466; doi:10.3390/ijms21103661), 2020-05-22
Supplement: ijms-21-03661-s001.pdf [file ijms-21-03661-s001.pdf]

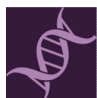

Supplementary Material for:

# Synthetic Strategies and Computational Inhibition Activity Study for Triazinyl-substituted Benzenesulfonamide Conjugates with Polar and Hydrophobic Amino Acids as Inhibitors of Carbonic Anhydrases

Mária Bodnár Mikulová<sup>1</sup>, Dáša Kružlicová<sup>1</sup>, Daniel Pecher<sup>1,2</sup>, Claudiu T. Supuran<sup>3</sup>, Peter Mikuš<sup>1,2,\*</sup>

<sup>1</sup> Department of Pharmaceutical Analysis and Nuclear Pharmacy, Faculty of Pharmacy, Comenius University in Bratislava, Odbojárov 10, SK-832 32 Bratislava, Slovakia; mikulova43@uniba.sk (M.M.); pecher1@uniba.sk (D.P.); kruzlicova@fpharm.uniba.sk (D.K.)

<sup>2</sup> Toxicological and Antidoping Center, Faculty of Pharmacy, Comenius University in Bratislava, Odbojárov 10, SK-832 32 Bratislava, Slovakia

<sup>3</sup> Neurofarba Department, Section of Pharmaceutical and Nutriceutical Sciences, University of Florence, Italy; claudiu.supuran@unifi.it (C.S.).

\* Correspondence: [mikus@fpharm.uniba.sk](mailto:mikus@fpharm.uniba.sk) (P.M.); ORCID 0000-0001-5755-9970

**S1.** 2,2'-((6-([4-Sulfamoylphenyl]amino)-1,3,5-triazine-2,4-diyl)bis(amino))dipropanoic acid **2** and its IR (a), <sup>1</sup>H (b), <sup>13</sup>C (c) NMR and DAD/MS (d) spectra

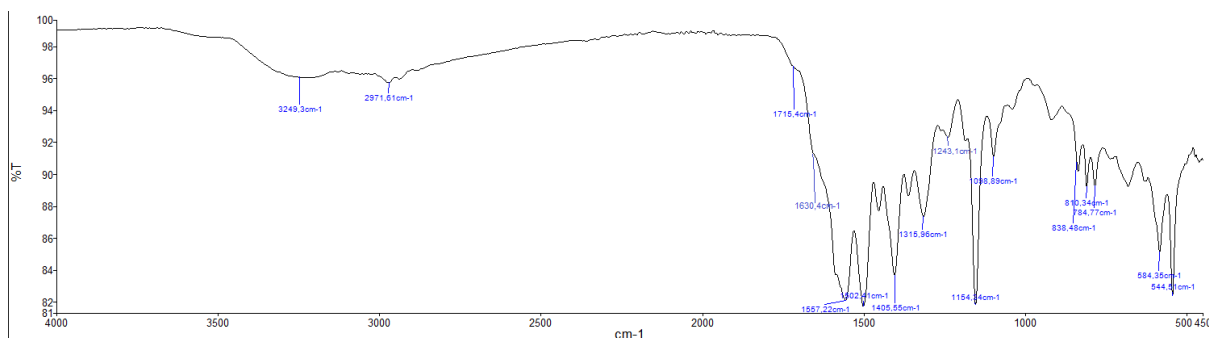

**Figure S1a.** IR spectra of product **2**.

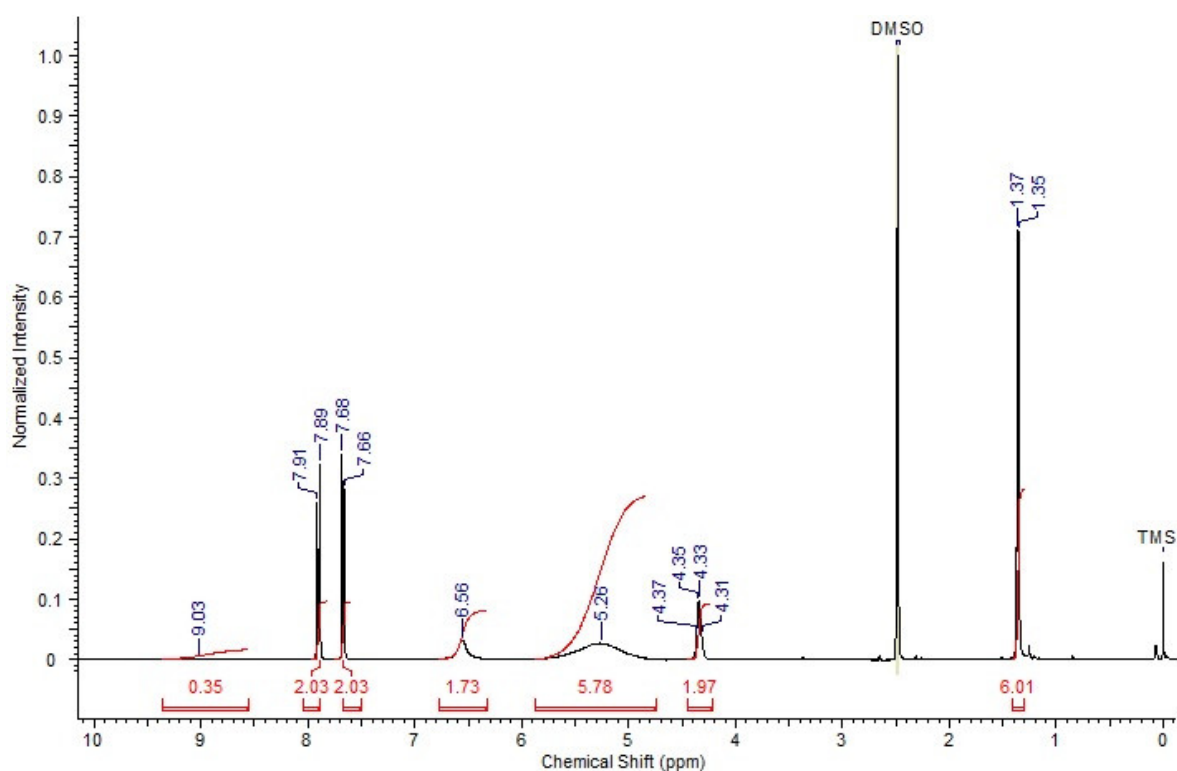

**Figure S1b.** <sup>1</sup>H NMR spectra of product **2**.

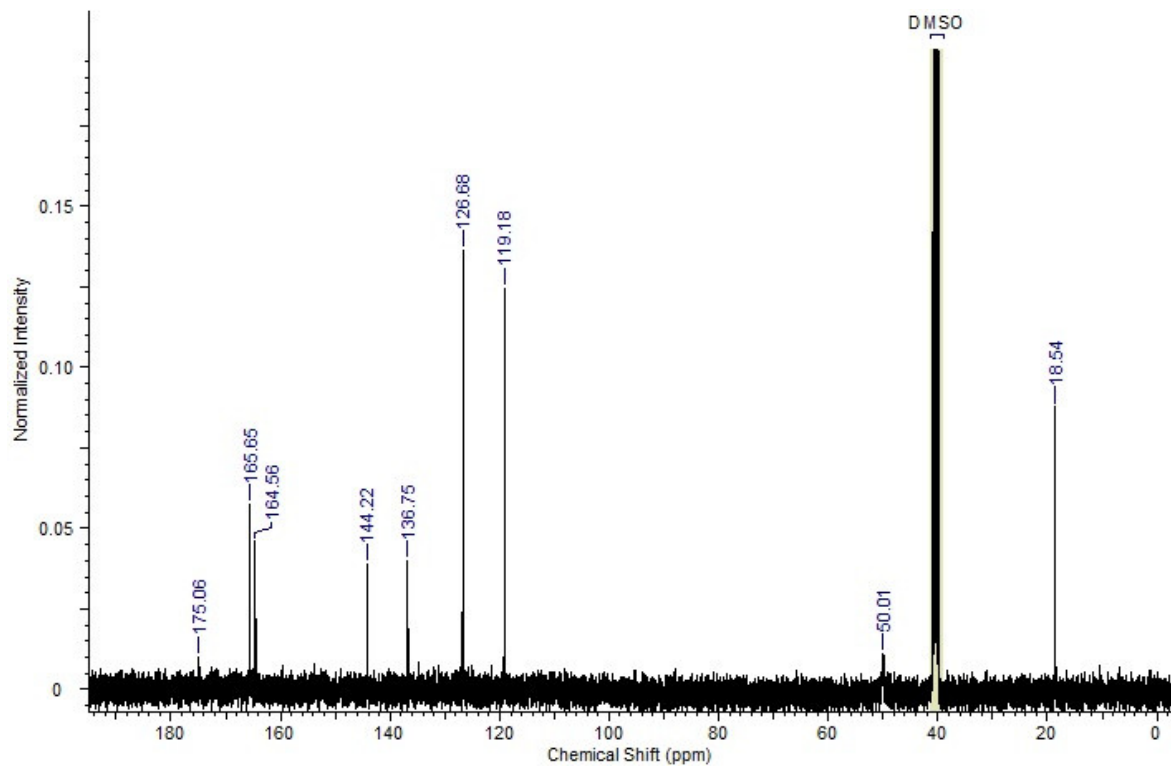

Figure S1c.  $^{13}\text{C}$  NMR spectra of product 2.

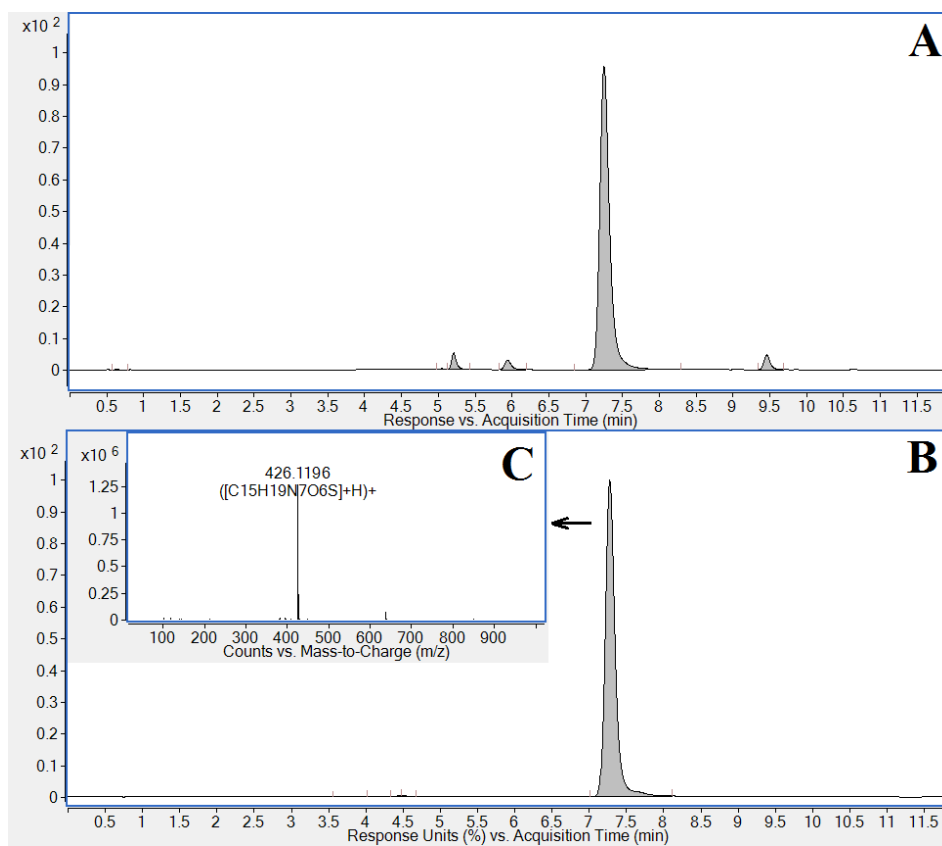

Figure S1d. HILIC-DAD-QTOF analysis of product 2. Purity profile (HILIC-DAD - 254 nm) before (panel A) and after (panel B) semi-preparative chromatography. Panel C – MS spectrum of the desired compound (the major peak from UV chromatogram).

**S2.** 2,2'-((6-([4-Sulfamoylphenyl]amino)-1,3,5-triazine-2,4-diyl)bis(amino))di(3-phenylpropanoic acid) **3** and its IR (a), <sup>1</sup>H (b), <sup>13</sup>C (c) NMR and DAD/MS (d) spectra

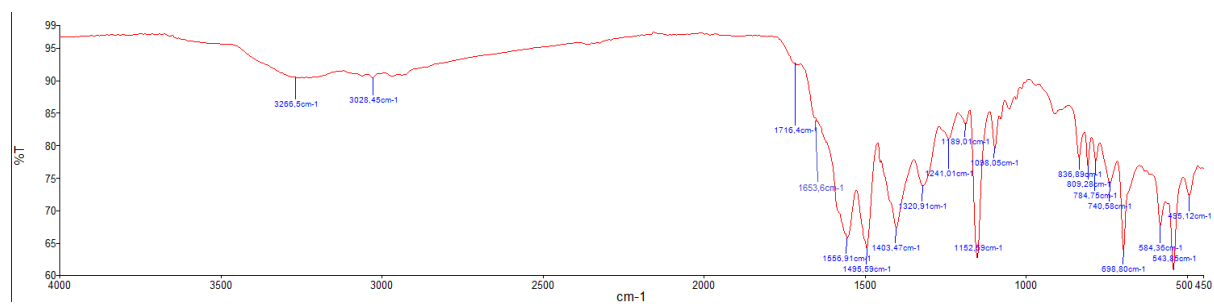

**Figure S2a.** IR spectra of product **3**.

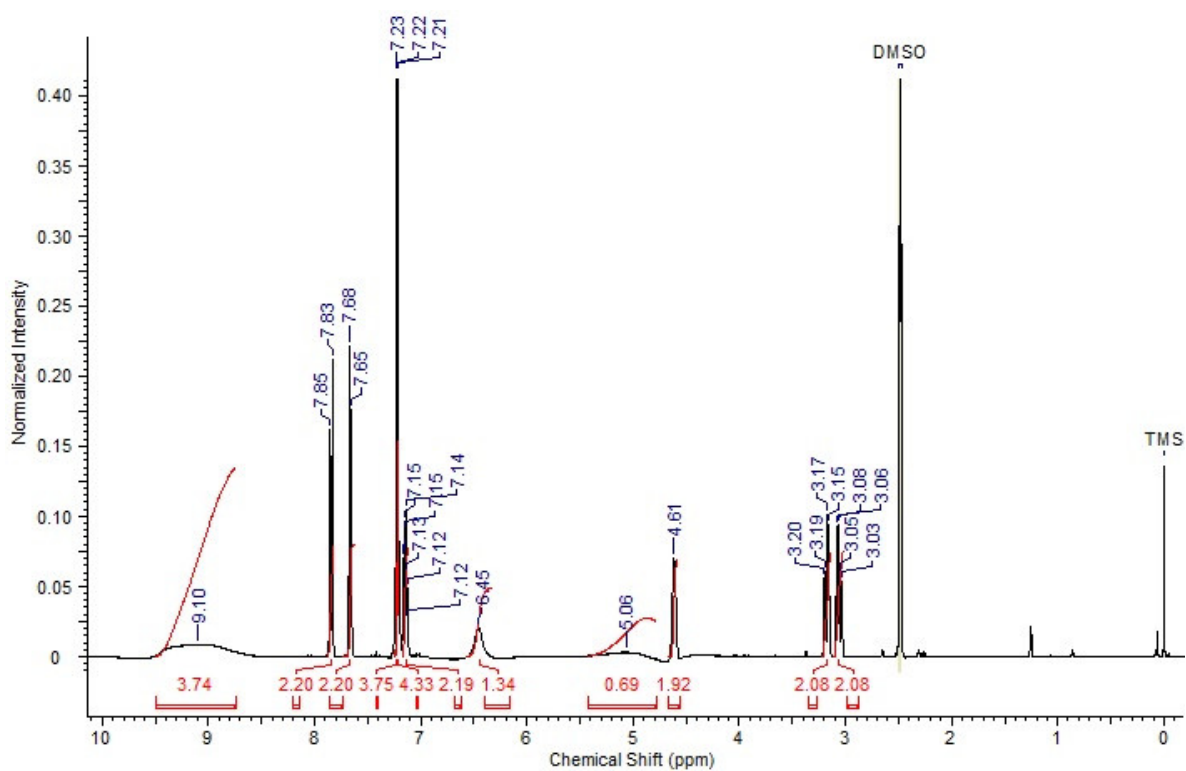

**Figure S2b.** <sup>1</sup>H NMR spectra of product **3**.

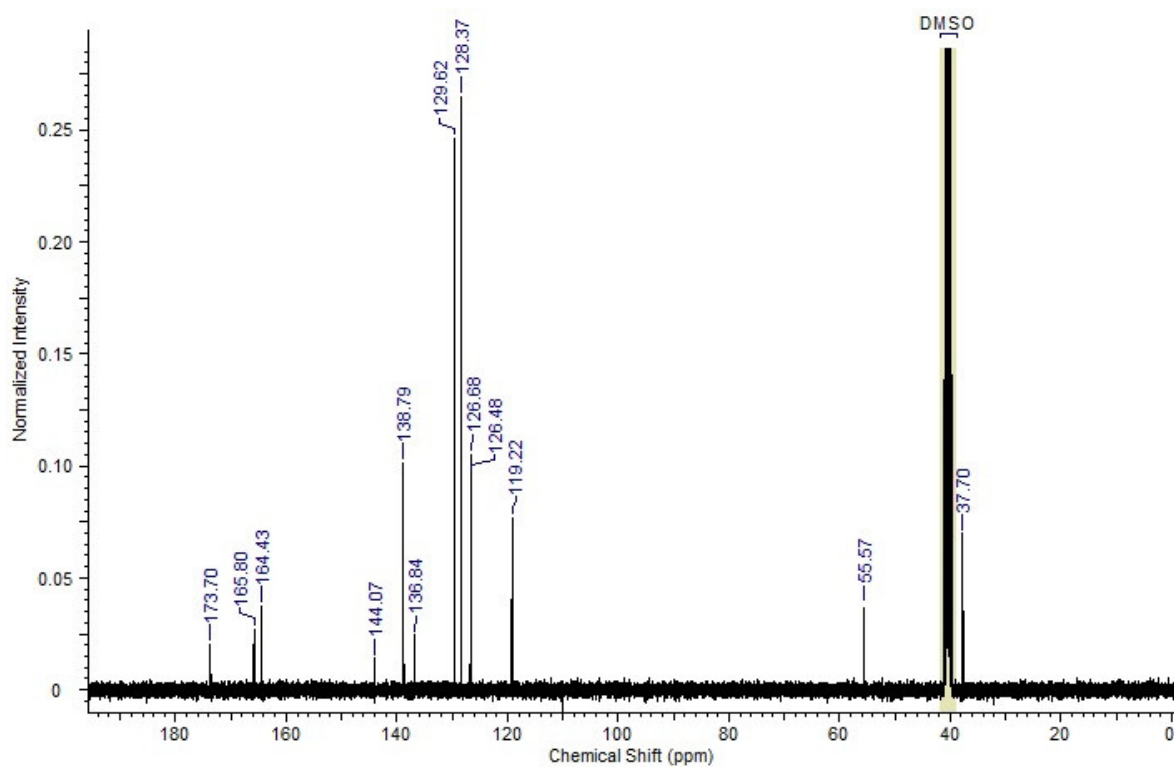

Figure S2c.  $^{13}\text{C}$  NMR spectra of product 3.

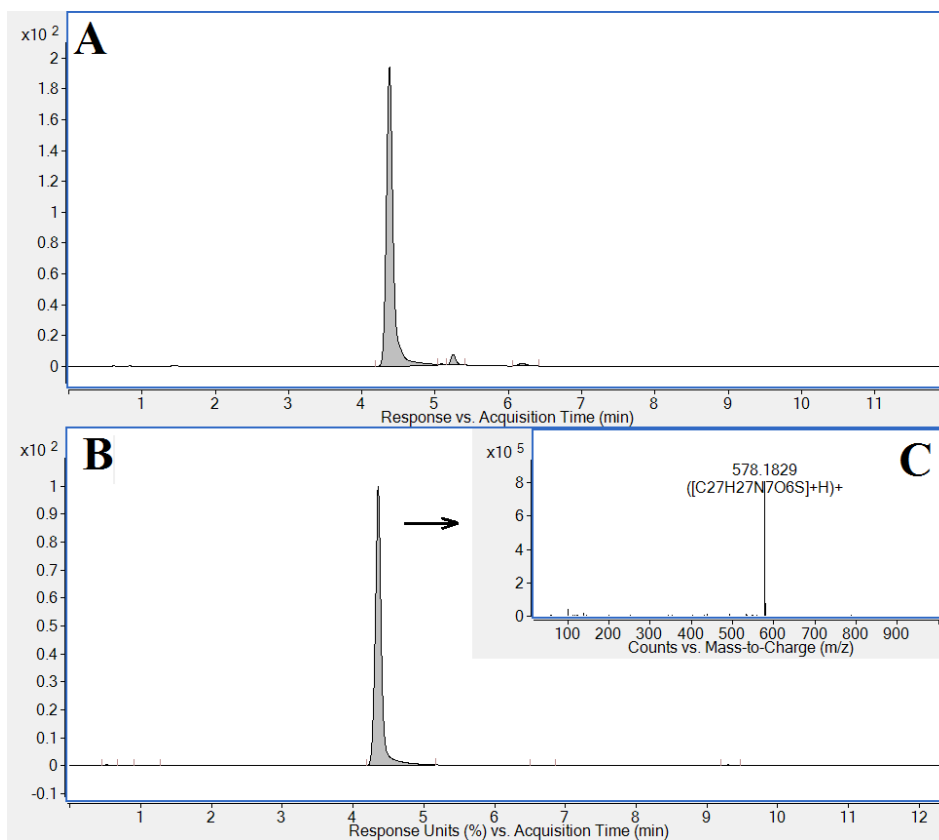

Figure S2d. HILIC-DAD-QTOF analysis of product 3. Purity profile (HILIC-DAD - 254 nm) before (panel A) and after (panel B) semi-preparative chromatography. Panel C – MS spectrum of the desired compound (the major peak from UV chromatogram).

### S3.

2,2'-((6-([4-Sulfamoylphenyl]amino)-1,3,5-triazine-2,4-diyl)bis(amino))di(3-(4-hydroxyphenyl)propanoic acid) **4** and its IR (a),  $^1\text{H}$  (b),  $^{13}\text{C}$  (c) NMR and DAD/MS (d) spectra

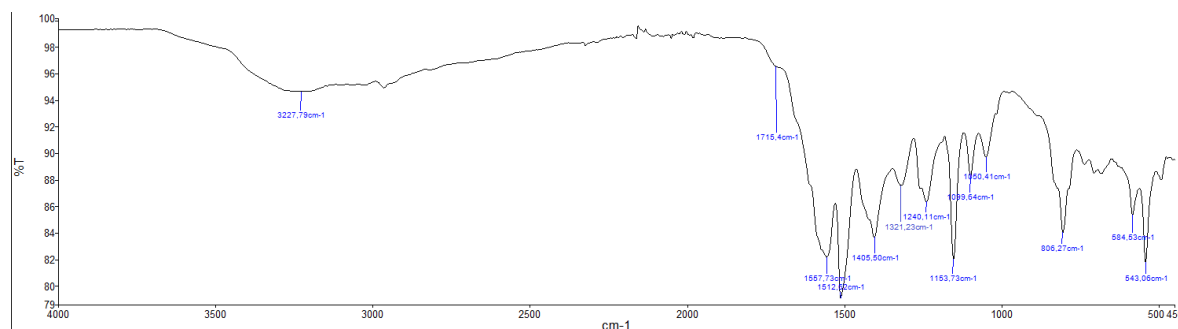

Figure S3a. IR spectra of product **4**.

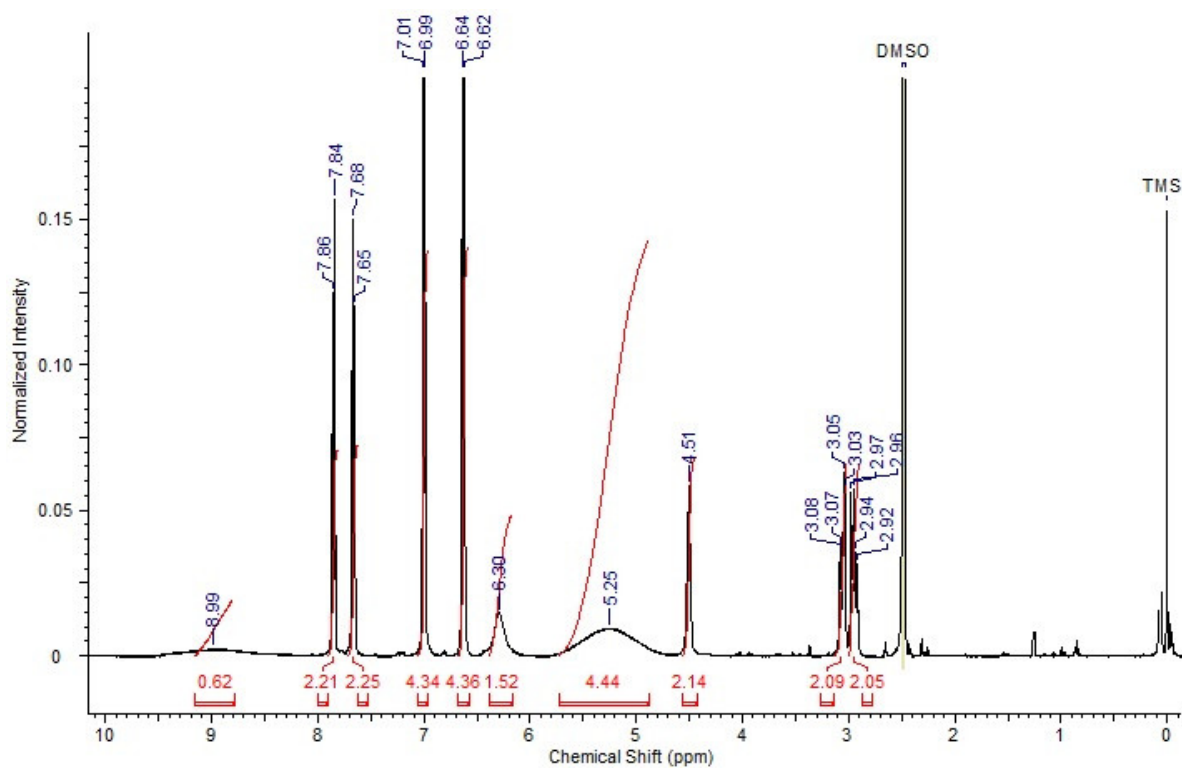

Figure S3b.  $^1\text{H}$  NMR spectra of product **4**.

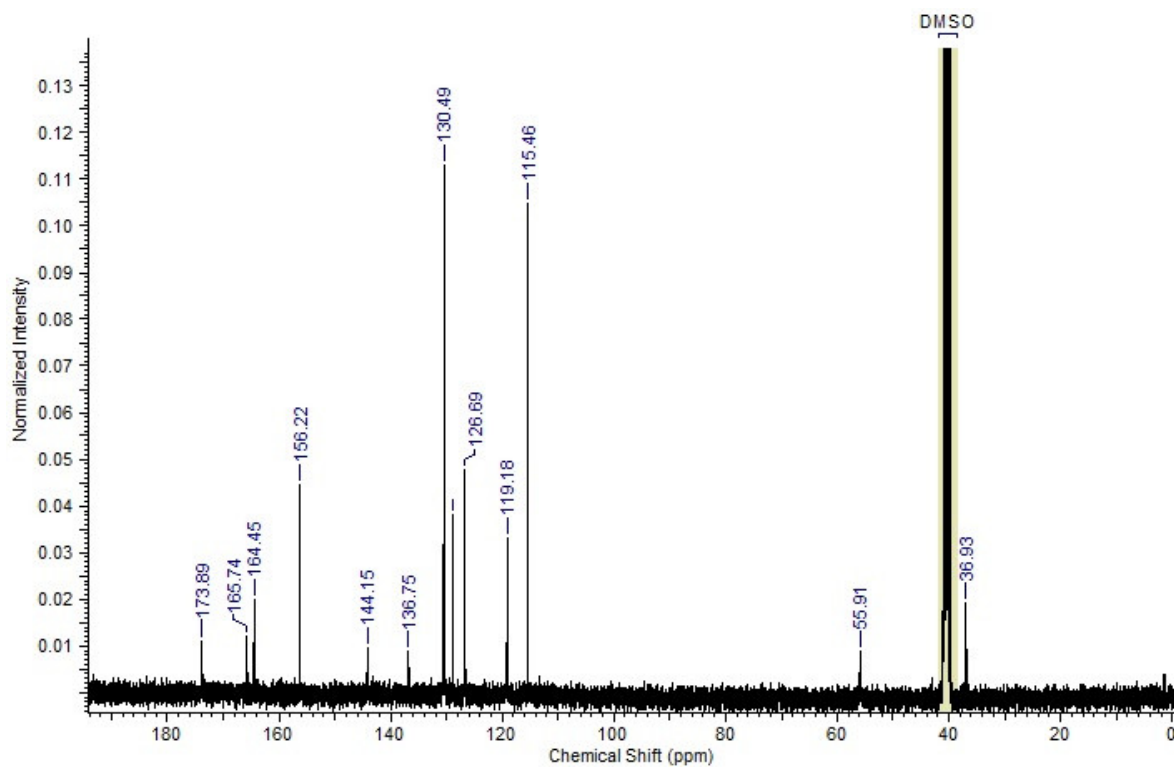

Figure S3c.  $^{13}\text{C}$  NMR spectra of product 4.

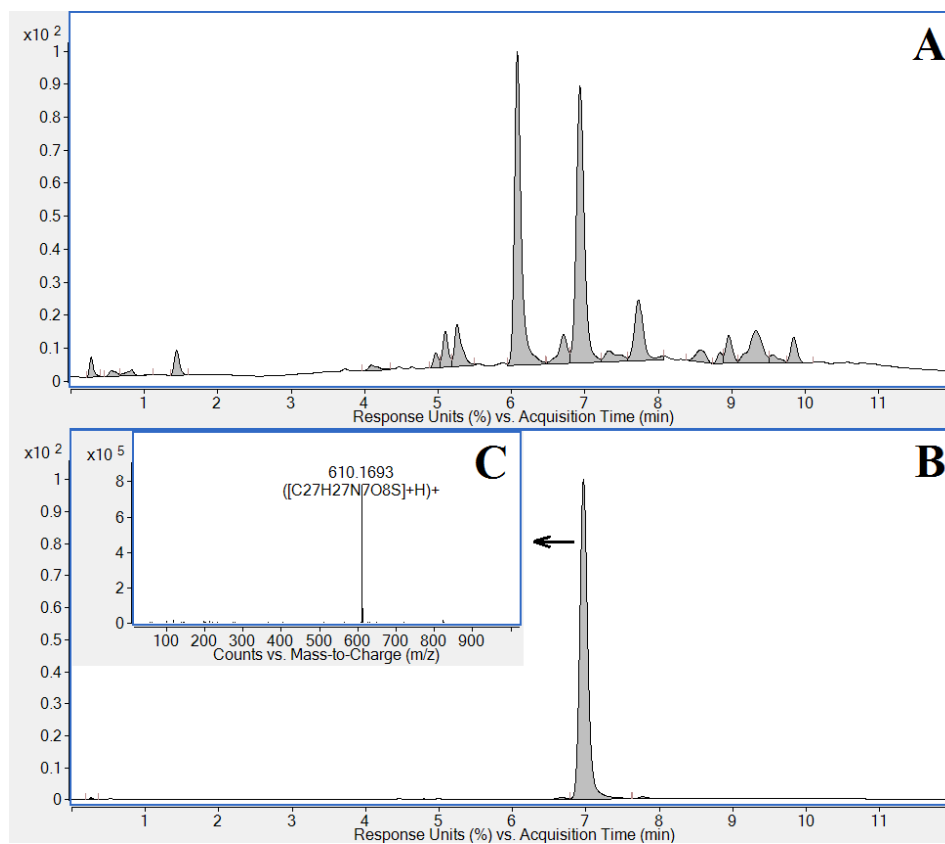

Figure S3d. HILIC-DAD-QTOF analysis of product 4. Purity profile (HILIC-DAD - 254 nm) before (panel A) and after (panel B) semi-preparative chromatography. Panel C – MS spectrum of the desired compound (the major peak from UV chromatogram).

#### S4.

2,2'-((6-([4-Sulfamoylphenyl]amino)-1,3,5-triazine-2,4-diyl)bis(amino))di-(3-(1*H*-indol-3-yl)propanoic acid) **5** and its IR (a), <sup>1</sup>H (b), <sup>13</sup>C (c) NMR and DAD/MS (d) spectra

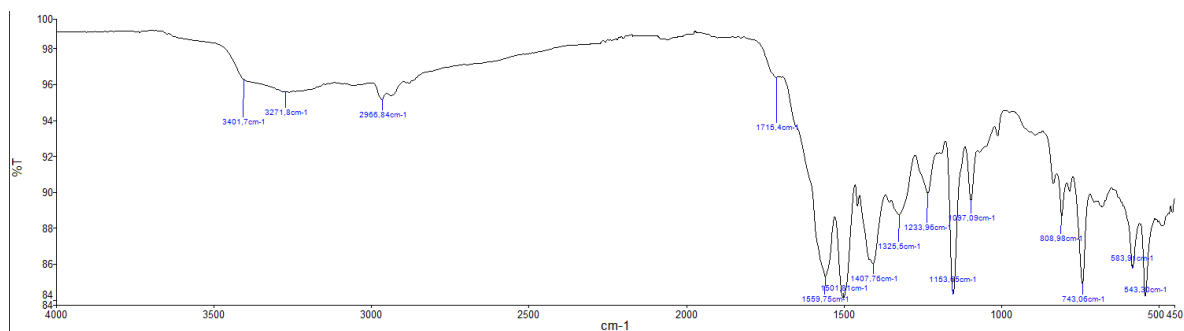

Figure S4a. IR spectra of product **5**.

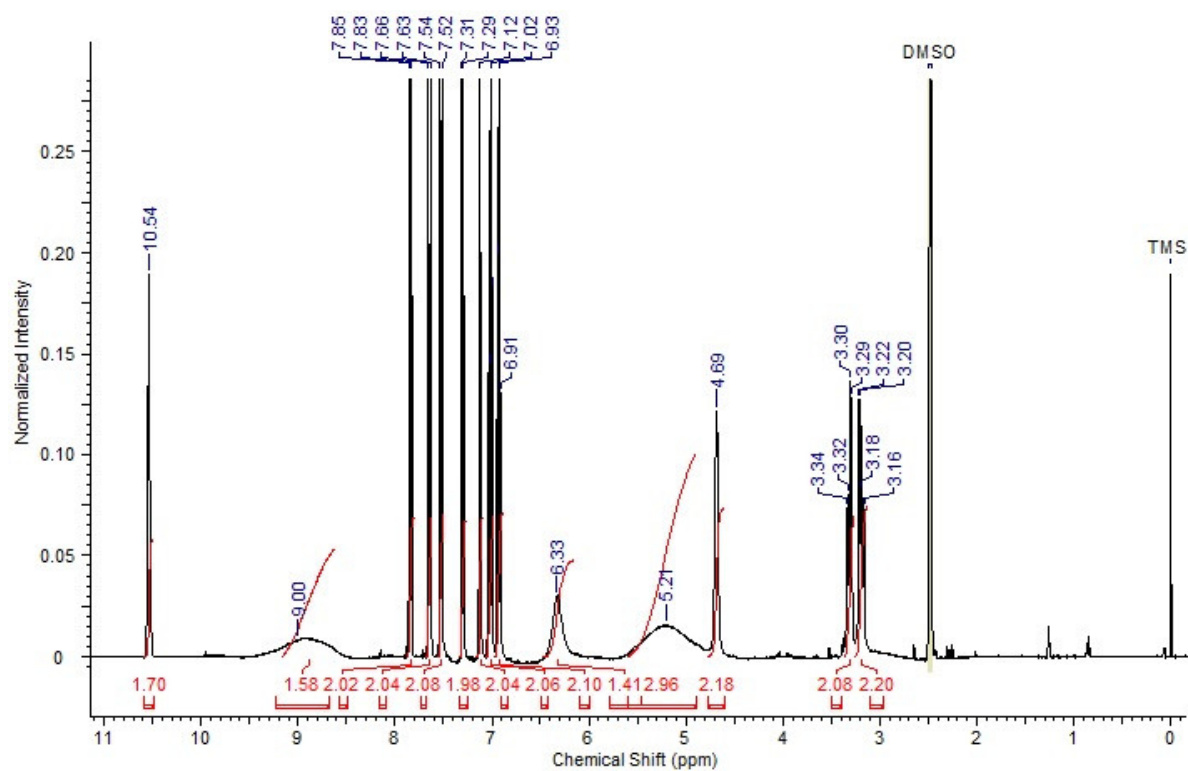

Figure S4b. <sup>1</sup>H NMR spectra of product **5**.



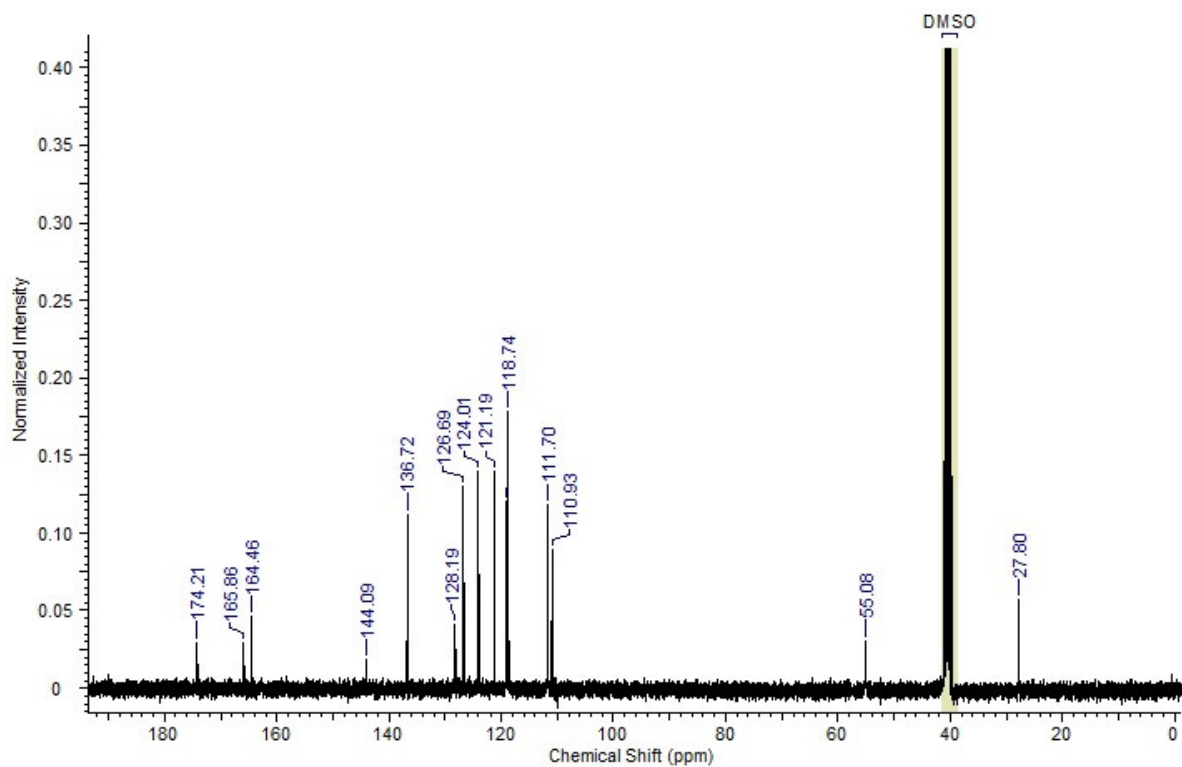

Figure S4c.  $^{13}\text{C}$  NMR spectra of product 5.

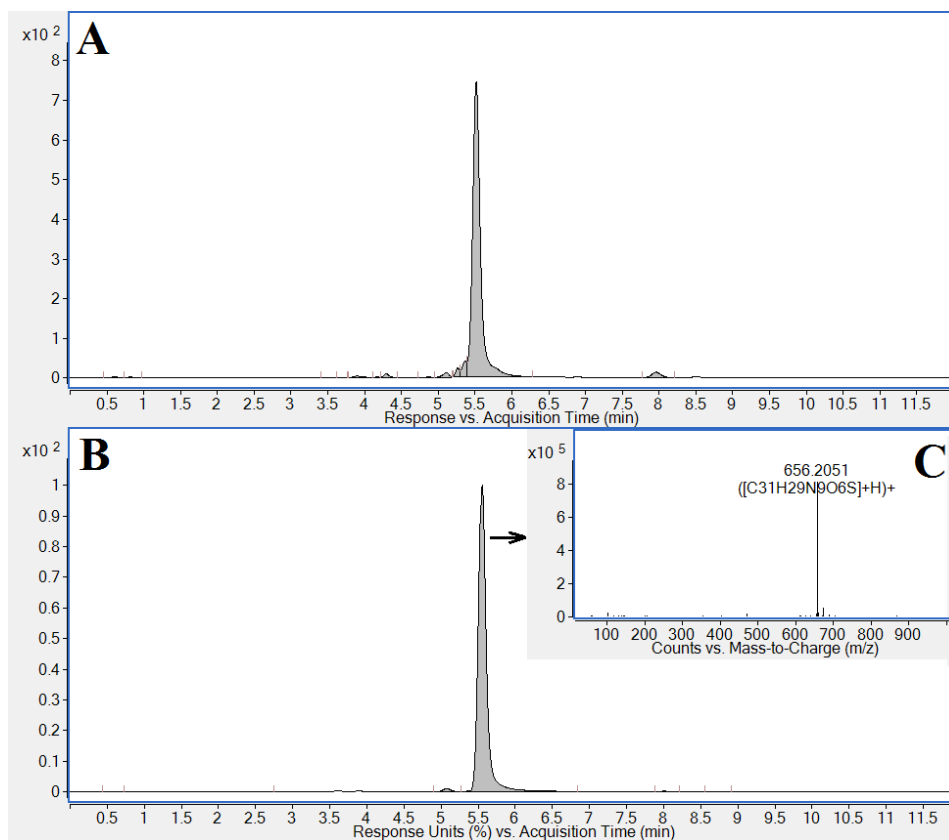

Figure S4d. HILIC-DAD-QTOF analysis of product 5. Purity profile (HILIC-DAD - 254 nm) before (panel A) and after (panel B) semi-preparative chromatography. Panel C – MS spectrum of the desired compound (the major peak from UV chromatogram).

**S5.** 2,2'-((6-([4-Sulfamoylphenyl]amino)-1,3,5-triazine-2,4-diyl)bis(amino))di(4-amino-4-oxobutanoic acid) **6** and its IR (a), <sup>1</sup>H (b), <sup>13</sup>C (c) NMR and DAD/MS (d) spectra.

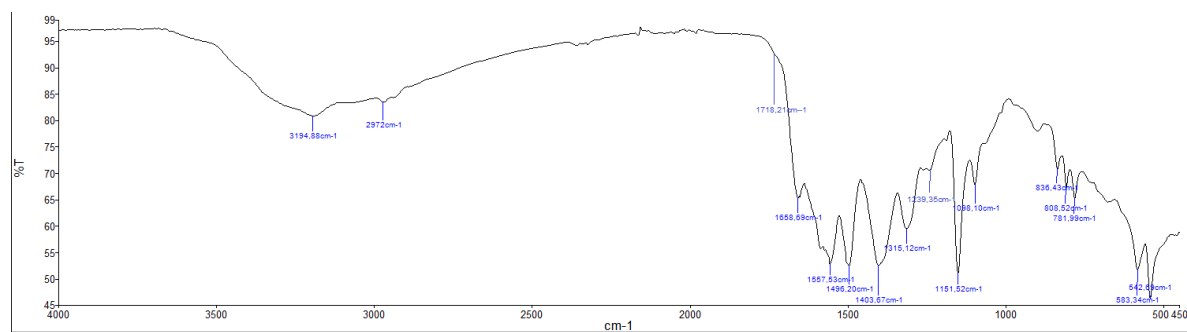

**Figure S5a.** IR spectra of product **6**.

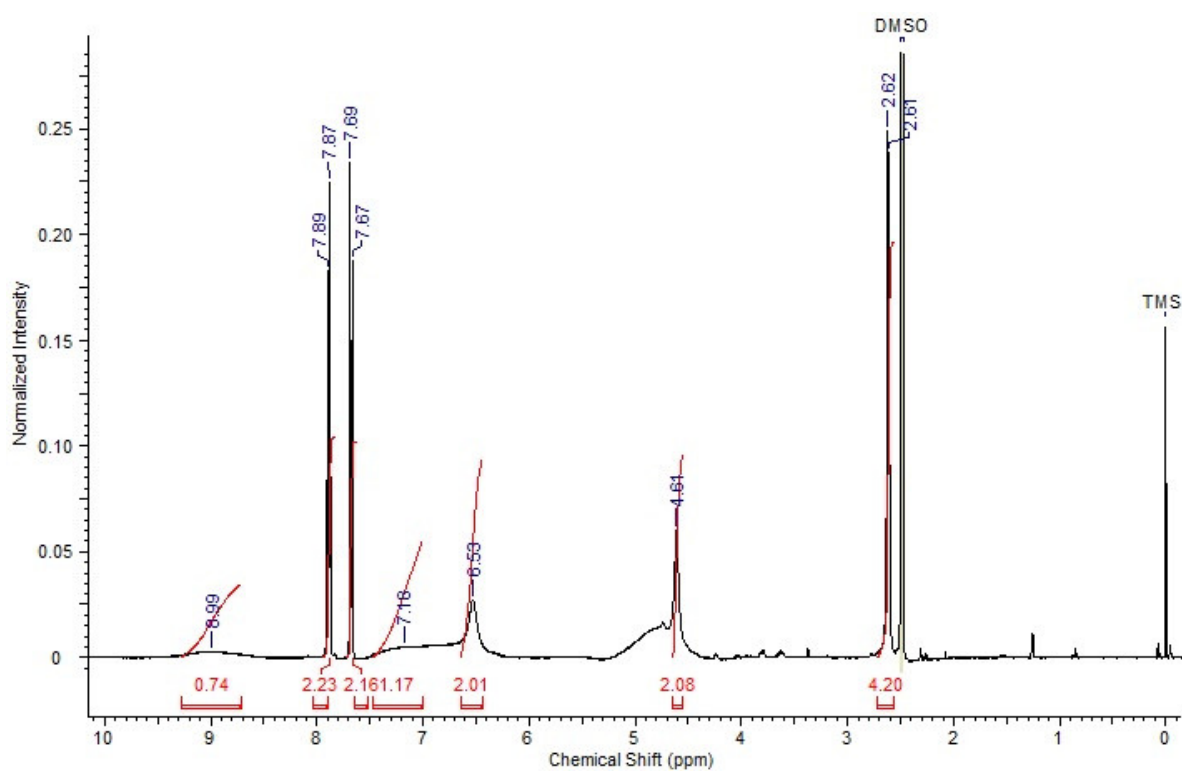

**Figure S5b.** <sup>1</sup>H NMR spectra of product **6**.

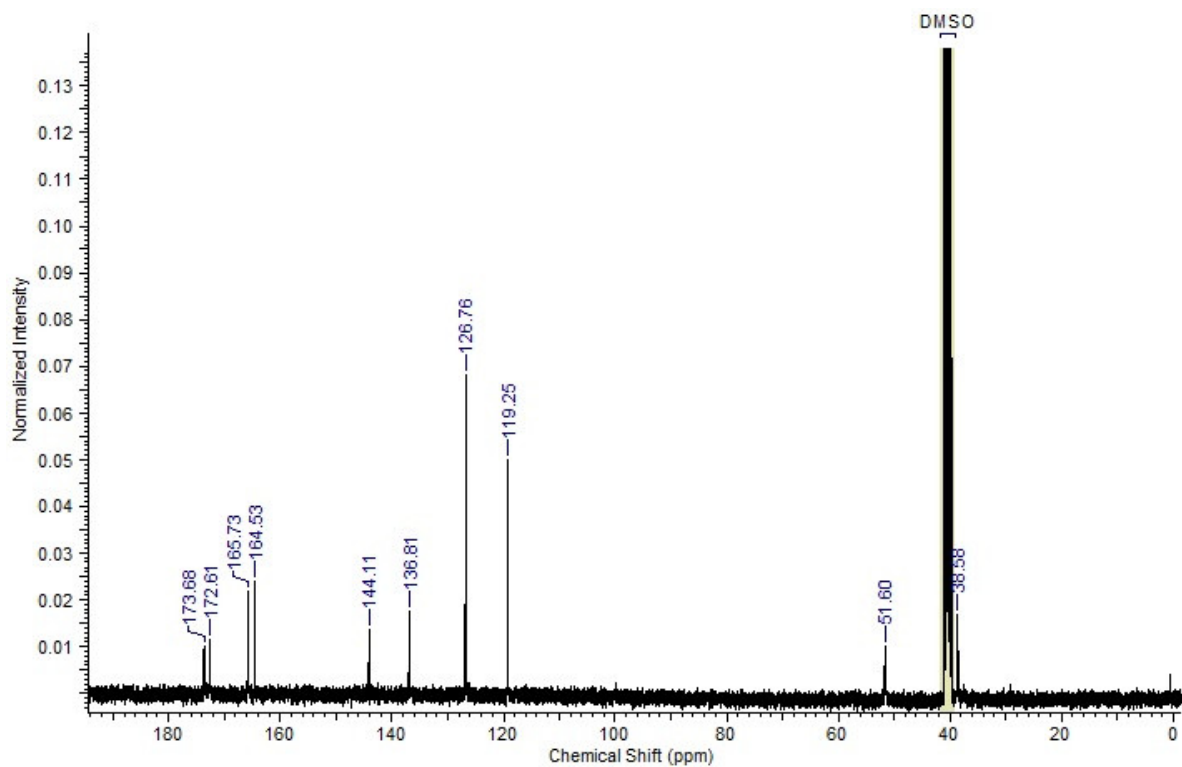

Figure S5c.  $^{13}\text{C}$  NMR spectra of product 6.

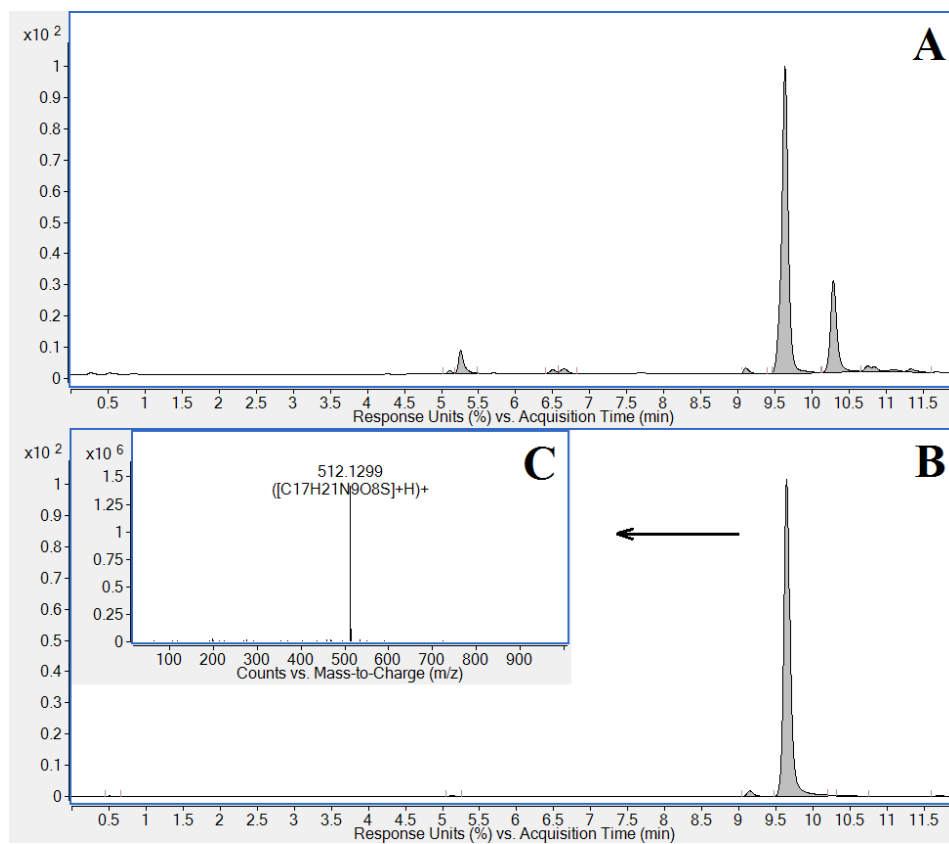

Figure S5d. HILIC-DAD-QTOF analysis of product 6. Purity profile (HILIC-DAD - 254 nm) before (panel A) and after (panel B) semi-preparative chromatography. Panel C – MS spectrum of the desired compound (the major peak from UV chromatogram).

**S6.**

2,2'-((6-([4-Sulfamoylphenyl]amino)-1,3,5-triazine-2,4-diyl)bis(amino))di(5-amino-5-oxopentanoic acid) **7** and its IR (a), <sup>1</sup>H (b), <sup>13</sup>C (c) NMR and DAD/MS (d) spectra.

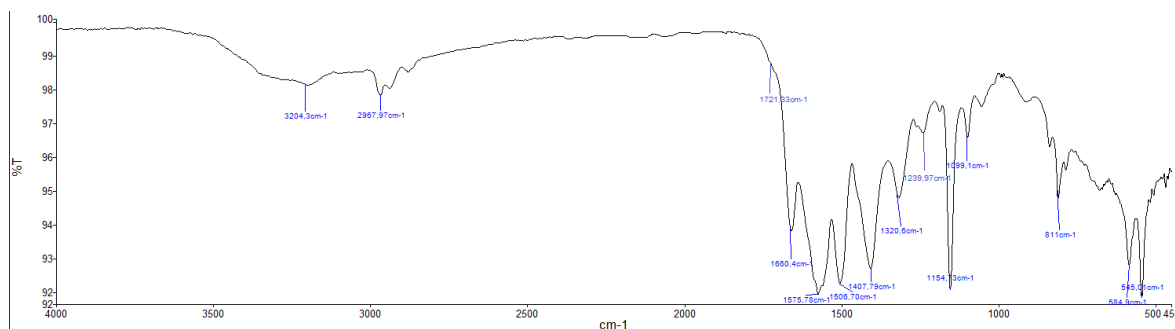

**Figure S6a.** IR spectra of product **7**.

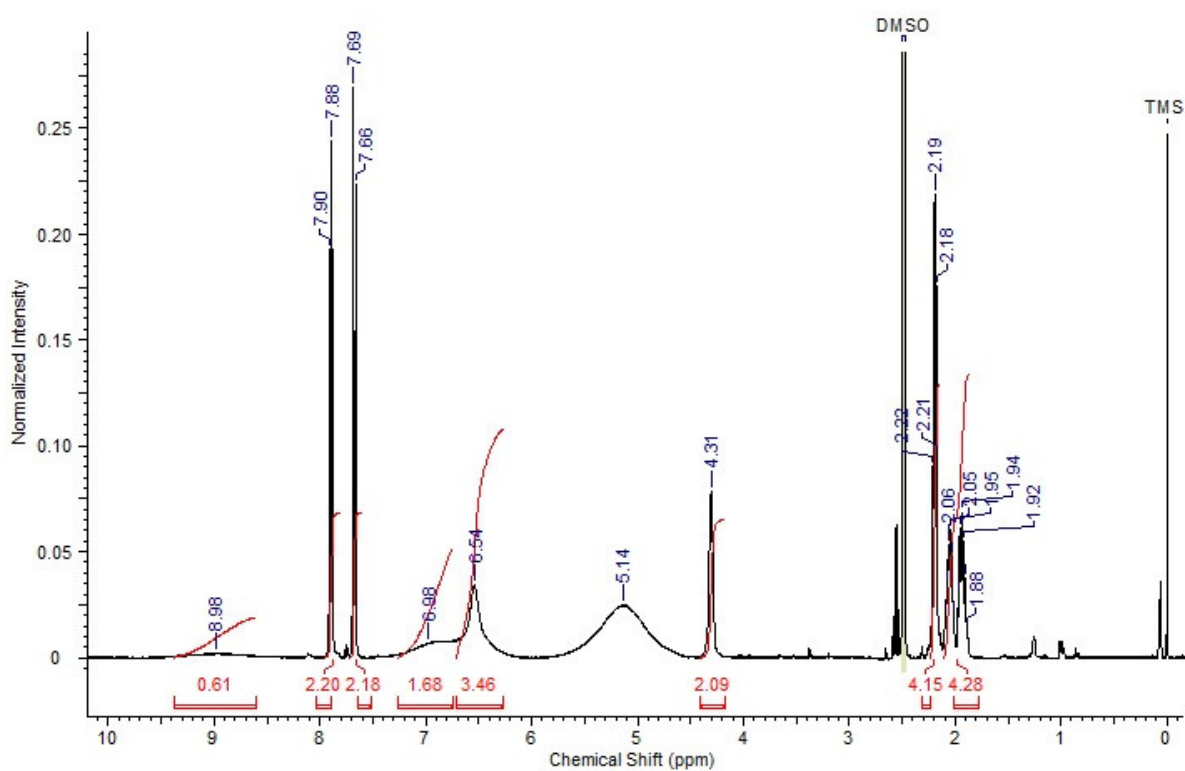

**Figure S6b.** <sup>1</sup>H NMR spectra of product **7**.

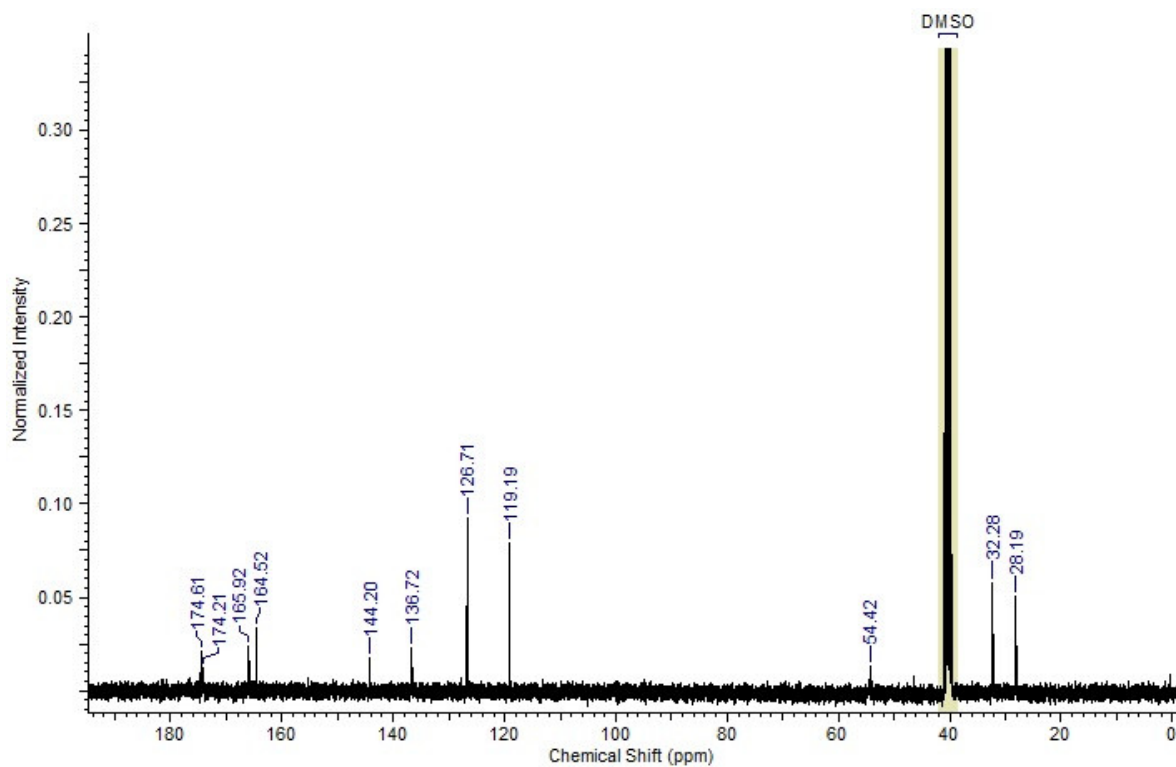

Figure S6c.  $^{13}\text{C}$  NMR spectra of product 7.

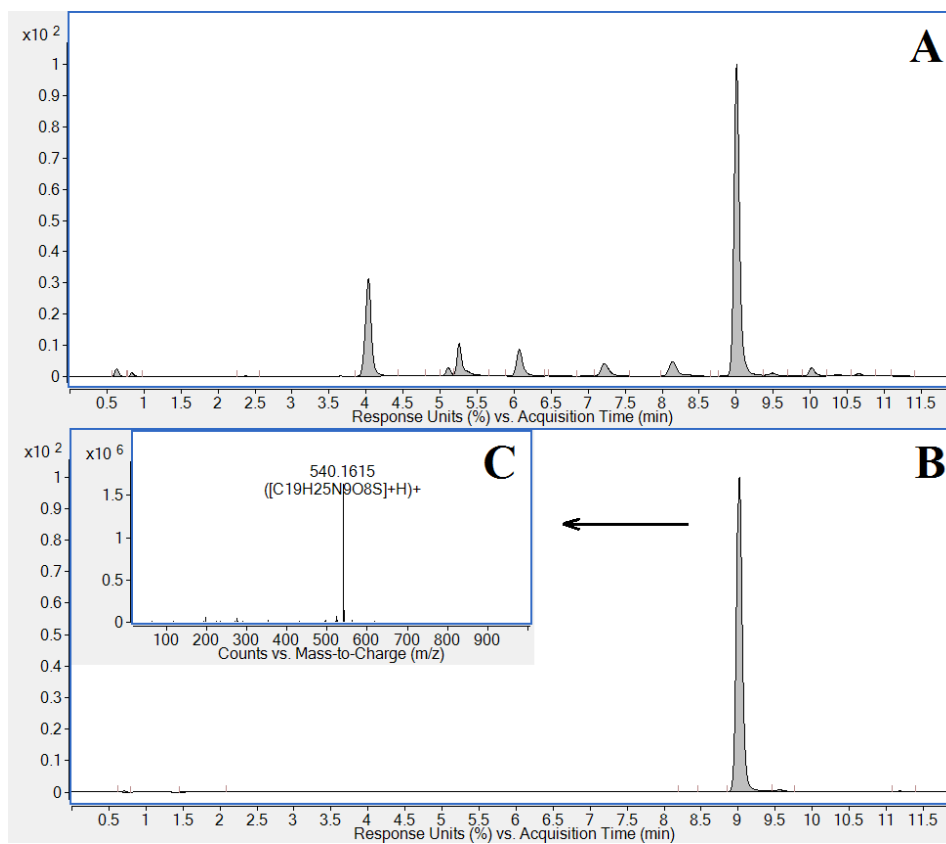

Figure S6d. HILIC-DAD-QTOF analysis of product 7. Purity profile (HILIC-DAD - 254 nm) before (panel A) and after (panel B) semi-preparative chromatography. Panel C – MS spectrum of the desired compound (the major peak from UV chromatogram).

**S7.** 2,2'-((6-([4-Sulfamoylphenyl]amino)-1,3,5-triazine-2,4-diyl)bis(amino))di(3-hydroxypropanoic acid) **8** and its IR (a), <sup>1</sup>H (b), <sup>13</sup>C (c) NMR and DAD/MS (d) spectra

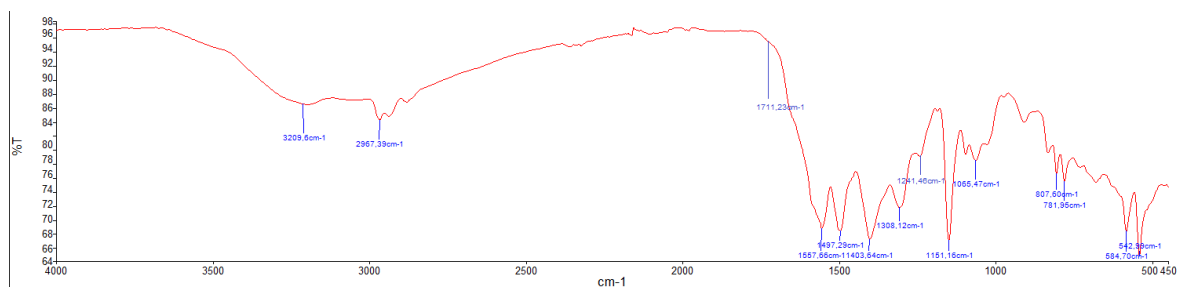

**Figure S7a.** IR spectra of product **8**.

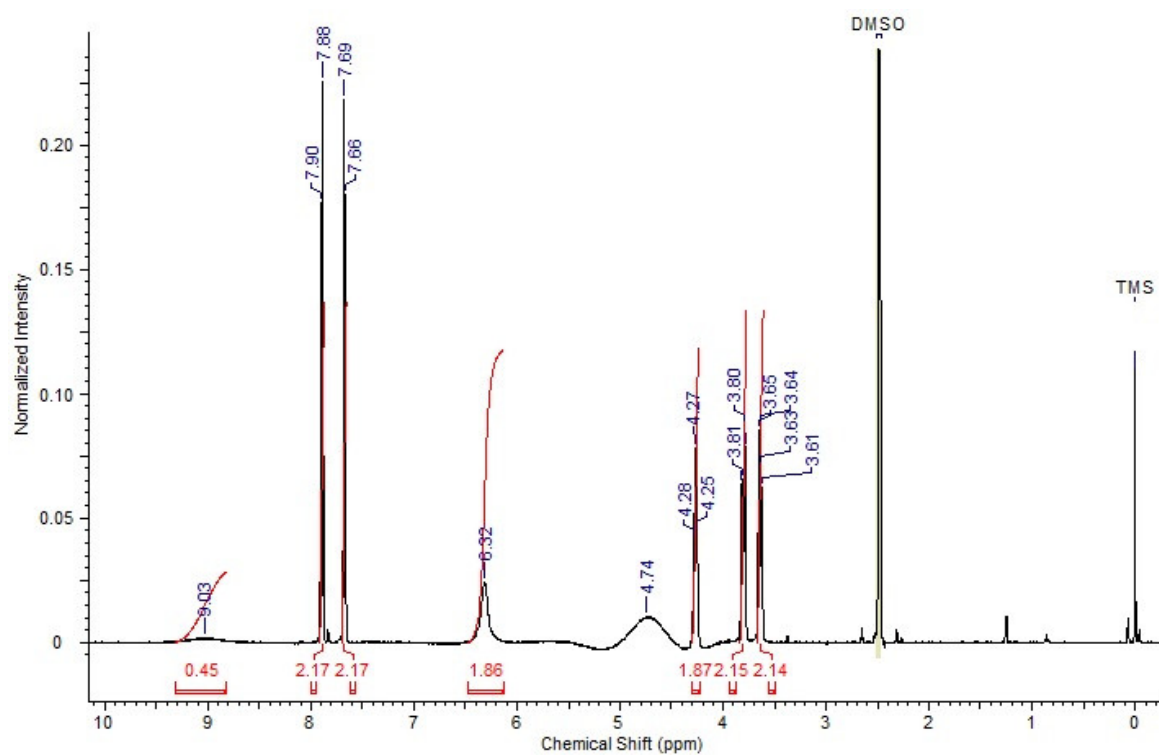

**Figure S7b.** <sup>1</sup>H NMR spectra of product **8**.

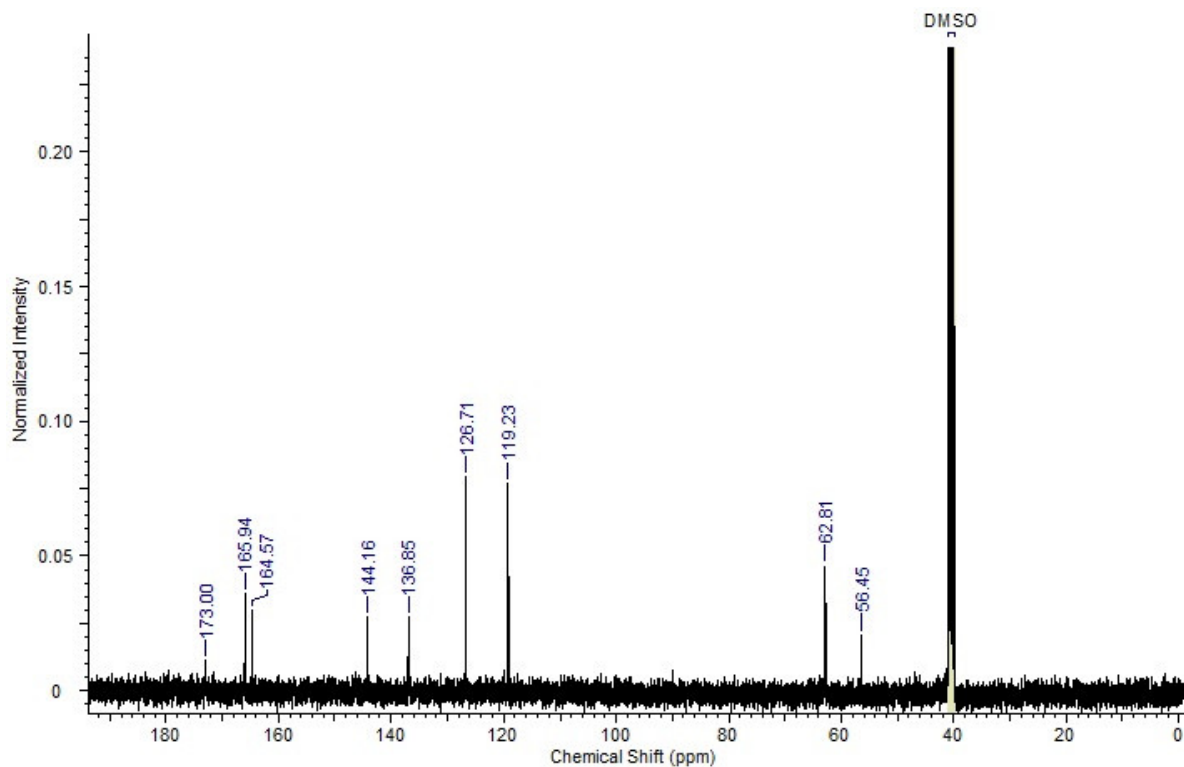

Figure S7c.  $^{13}\text{C}$  NMR spectra of product 8.

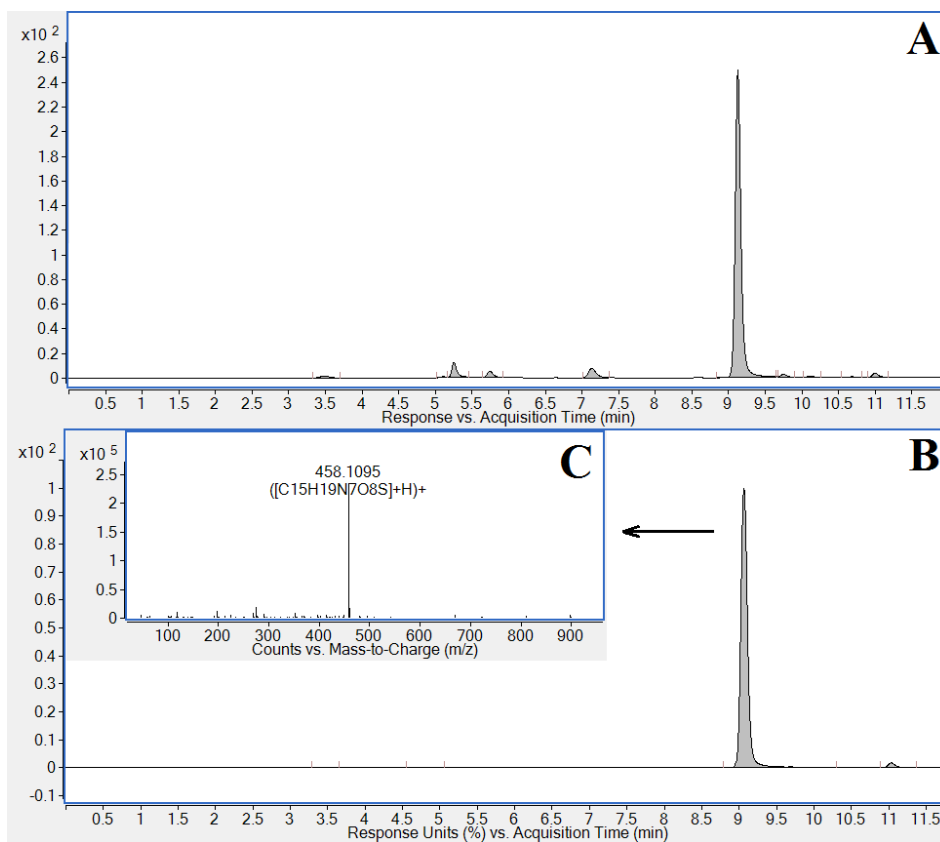

Figure S7d. HILIC-DAD-QTOF analysis of product 8. Purity profile (HILIC-DAD - 254 nm) before (panel A) and after (panel B) semi-preparative chromatography. Panel C - MS spectrum of the desired compound (the major peak from UV chromatogram).

**S8.** 2,2'-((6-([4-Sulfamoylphenyl]amino)-1,3,5-triazazine-2,4-diyl)bis(amino))di(3-hydroxybutanoic acid) **9** and its IR (a), <sup>1</sup>H (b), <sup>13</sup>C (c) NMR and DAD/MS (d) spectra

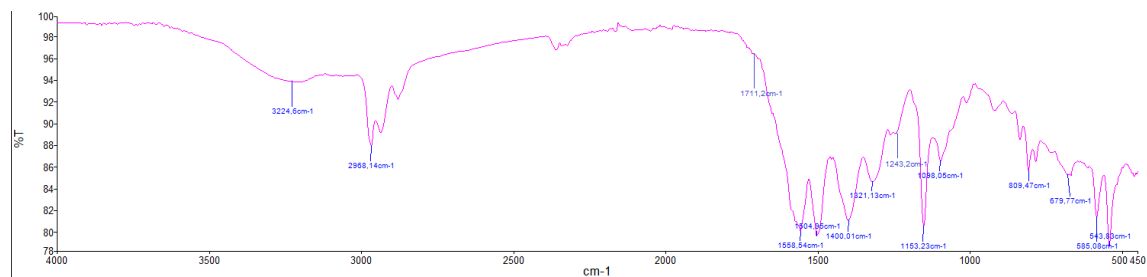

**Figure S8a.** IR spectra of product **9**.

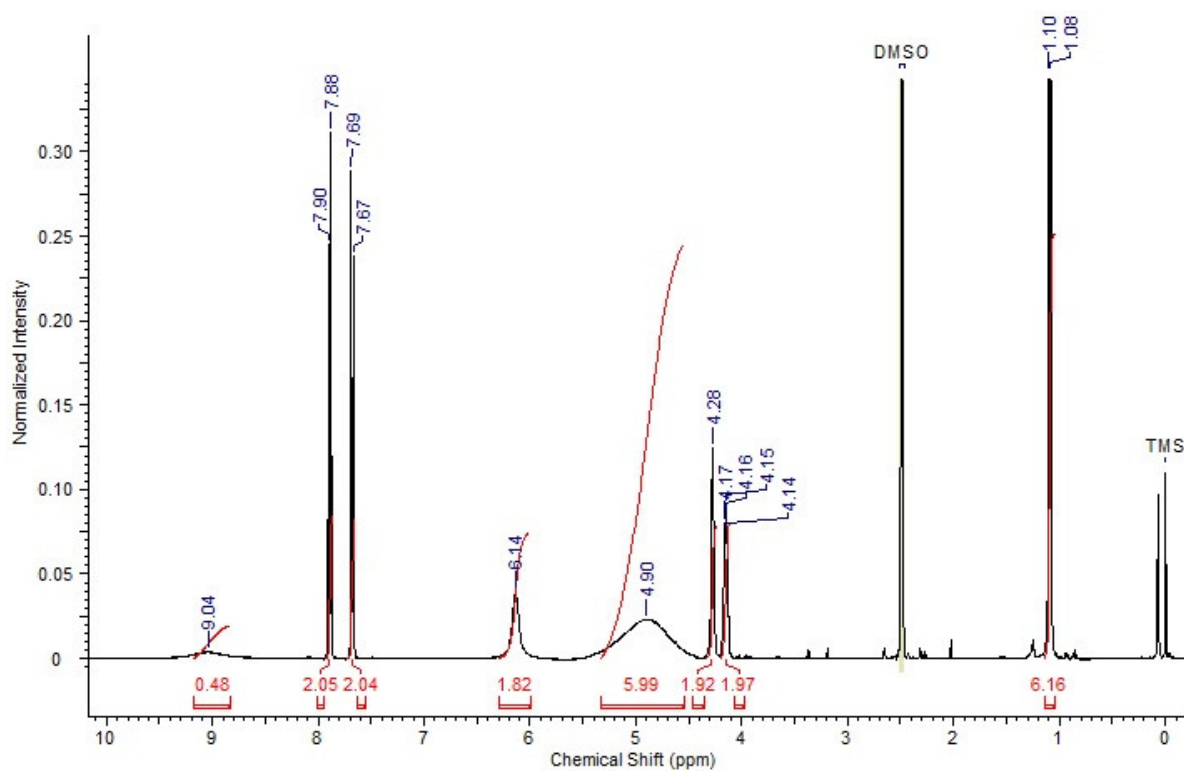

**Figure S8b.** <sup>1</sup>H NMR spectra of product **9**.



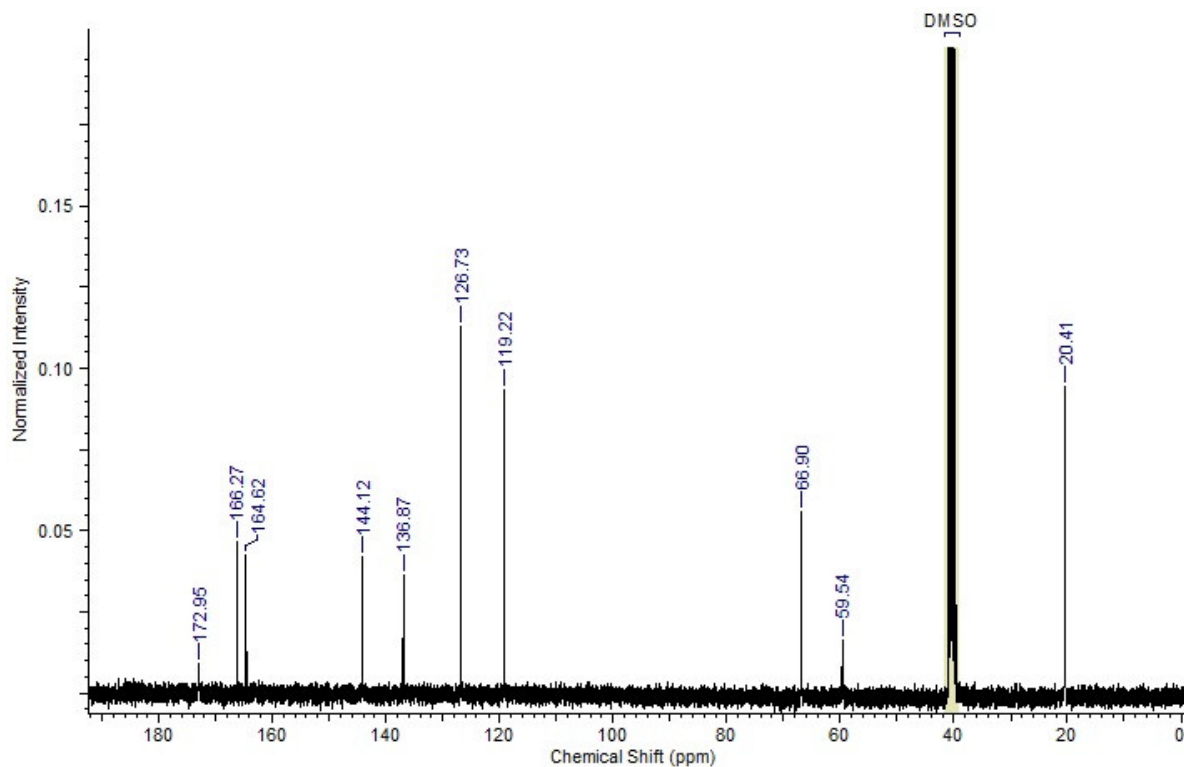

Figure S8c.  $^{13}\text{C}$  NMR spectra of product 9.

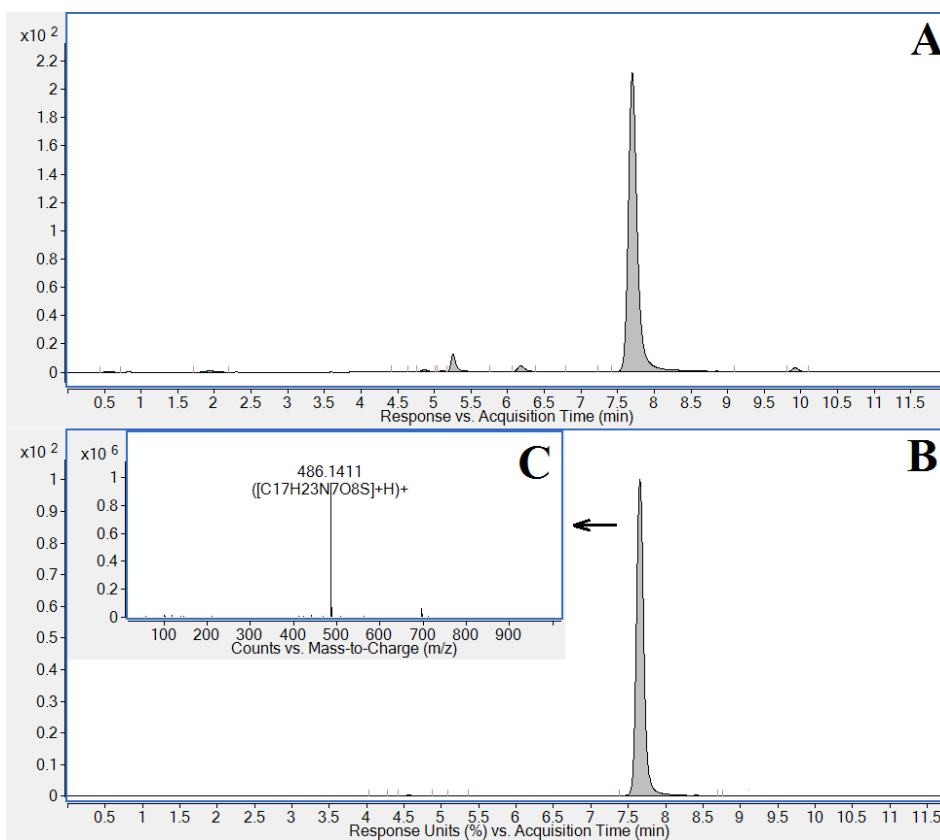

Figure S8d. HILIC-DAD-QTOF analysis of product 9. Purity profile (HILIC-DAD - 254 nm) before (panel A) and after (panel B) semi-preparative chromatography. Panel C – MS spectrum of the desired compound (the major peak from UV chromatogram).

**S9.** 2,2'-((6-([4-Sulfamoylphenyl]amino)-1,3,5-triazine-2,4-diyl)bis(amino))disuccinic acid **10** and its IR (a), <sup>1</sup>H (b), <sup>13</sup>C (c) NMR and DAD/MS (d) spectra.

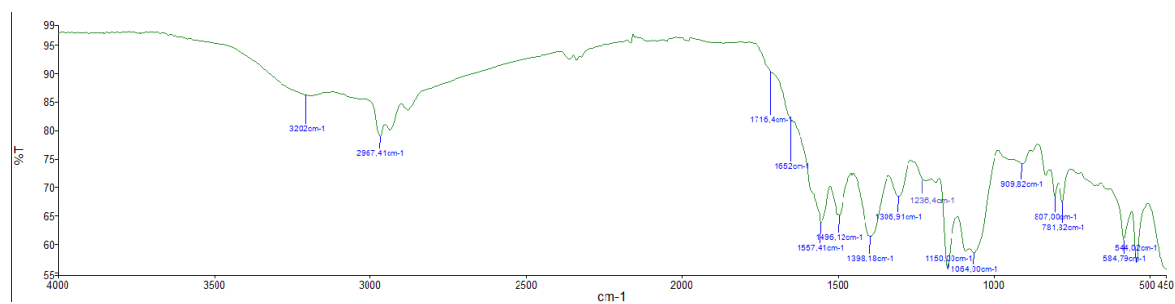

**Figure S9a.** IR spectra of product **10**.

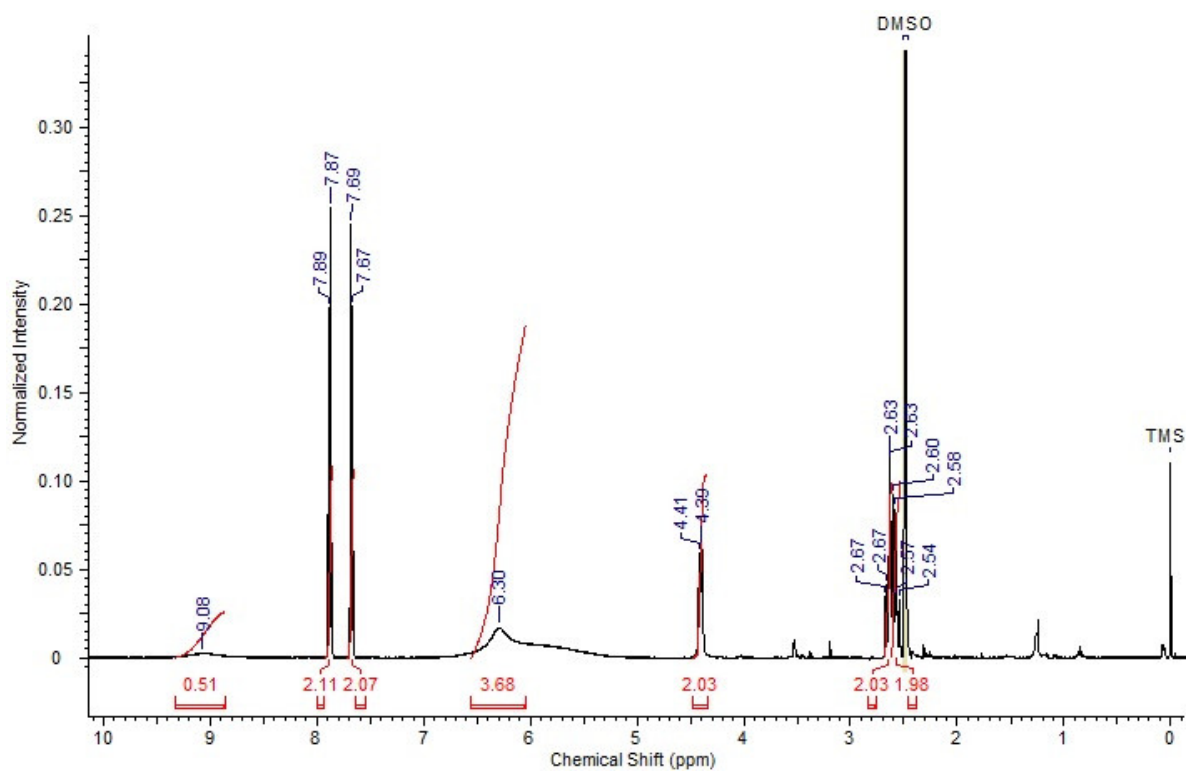

**Figure S9b.** <sup>1</sup>H NMR spectra of product **10**.

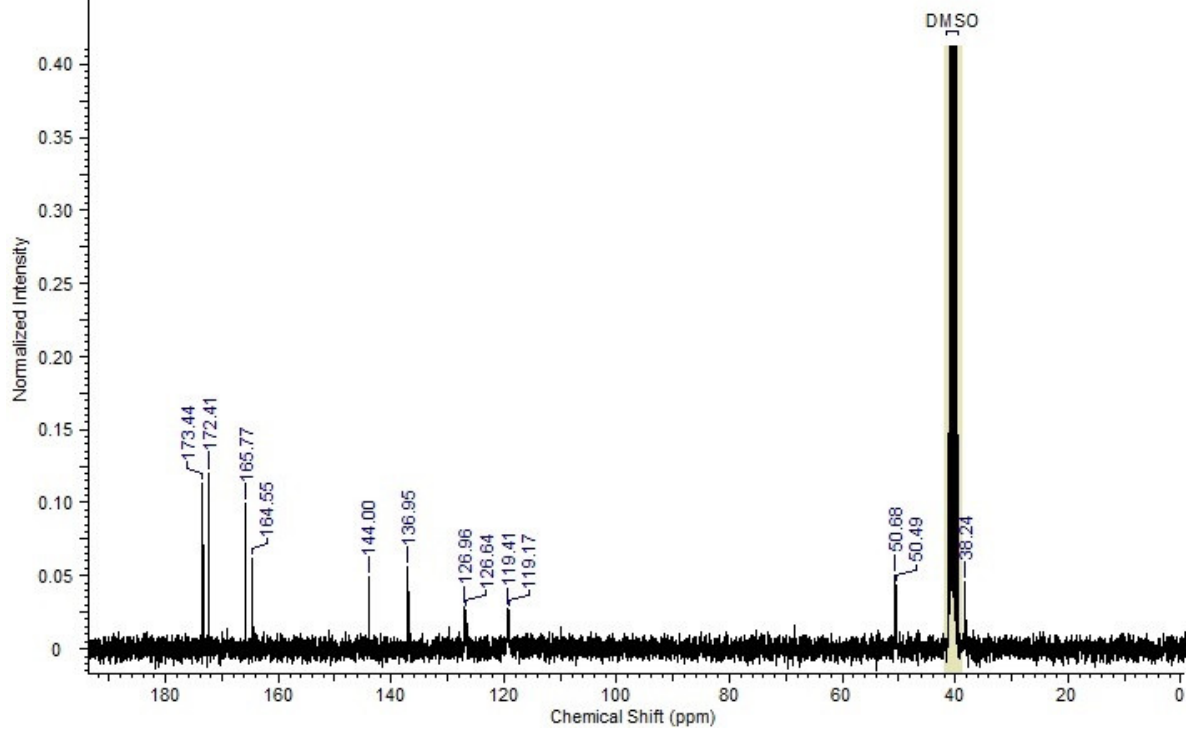

**Figure S9c.**  $^{13}\text{C}$  NMR spectra of product **10**.

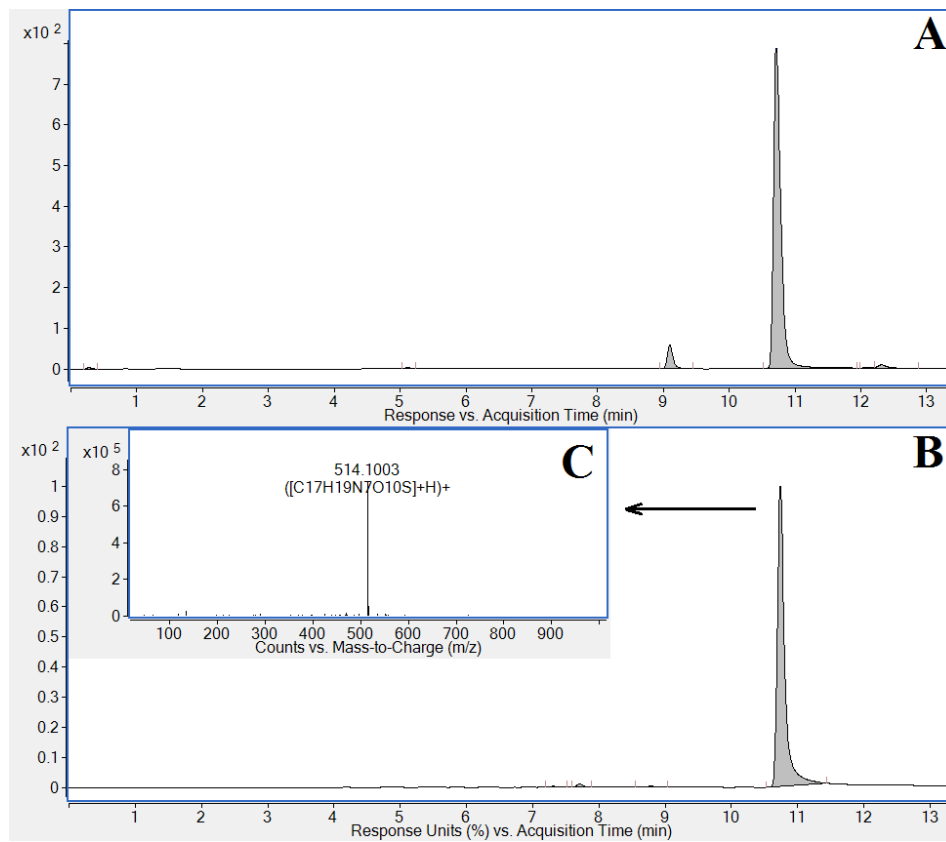

**Figure S9d.** HILIC-DAD-QTOF analysis of product **10**. Purity profile (HILIC-DAD - 254 nm) before (panel A) and after (panel B) semi-preparative chromatography. Panel C – MS spectrum of the desired compound (the major peak from UV chromatogram).

**S10.** 2,2'-((6-([4-Sulfamoylphenyl]amino)-1,3,5-triazine-2,4-diyl)bis(amino))diglutaric acid **11** and its IR (a), <sup>1</sup>H (b), <sup>13</sup>C (c) NMR and DAD/MS (d) spectra

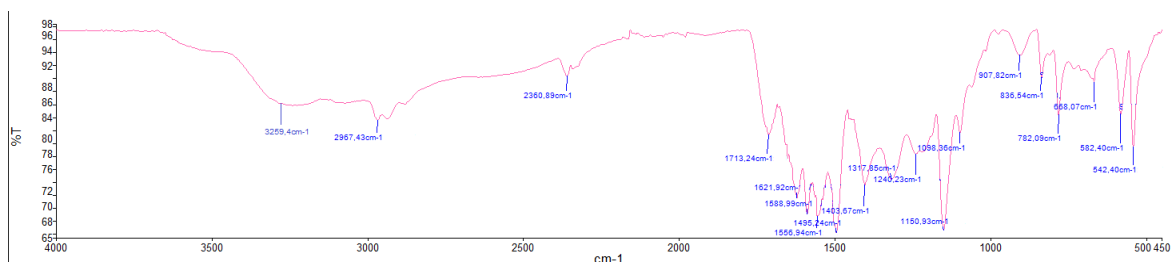

**Figure S10a.** IR spectra of product **11**.

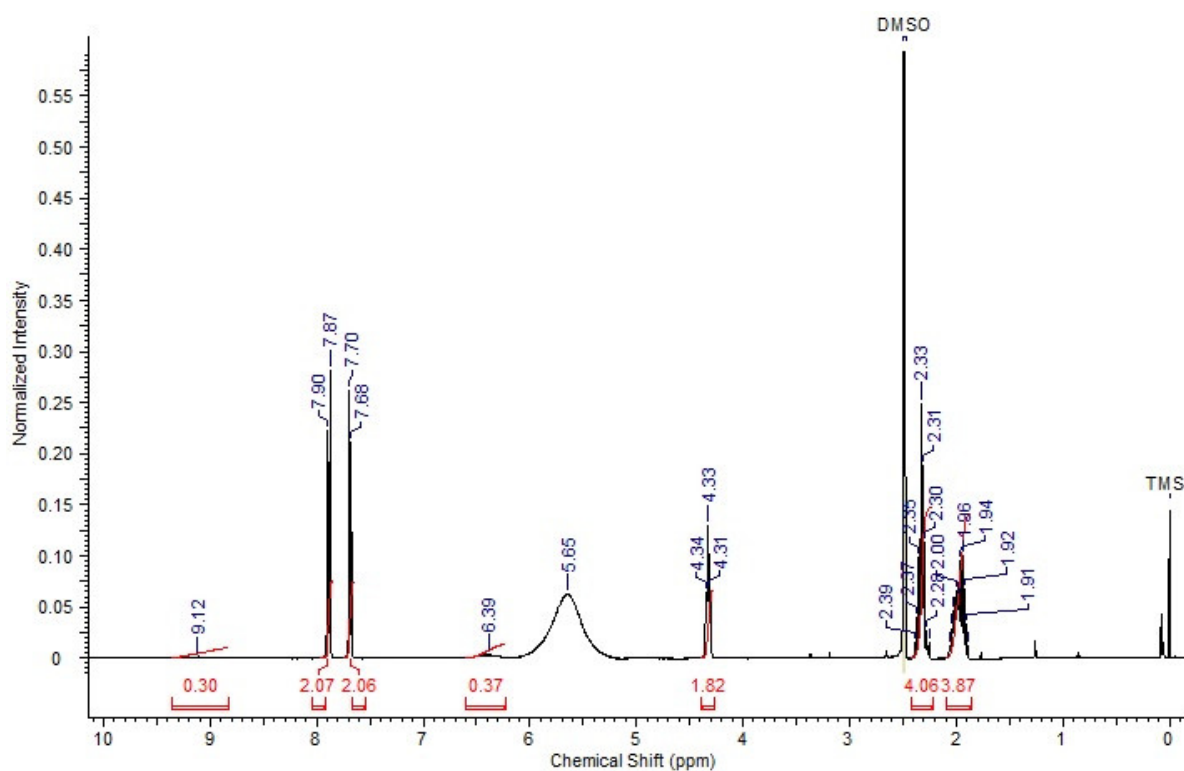

**Figure S10b.** <sup>1</sup>H NMR spectra of product **11**.

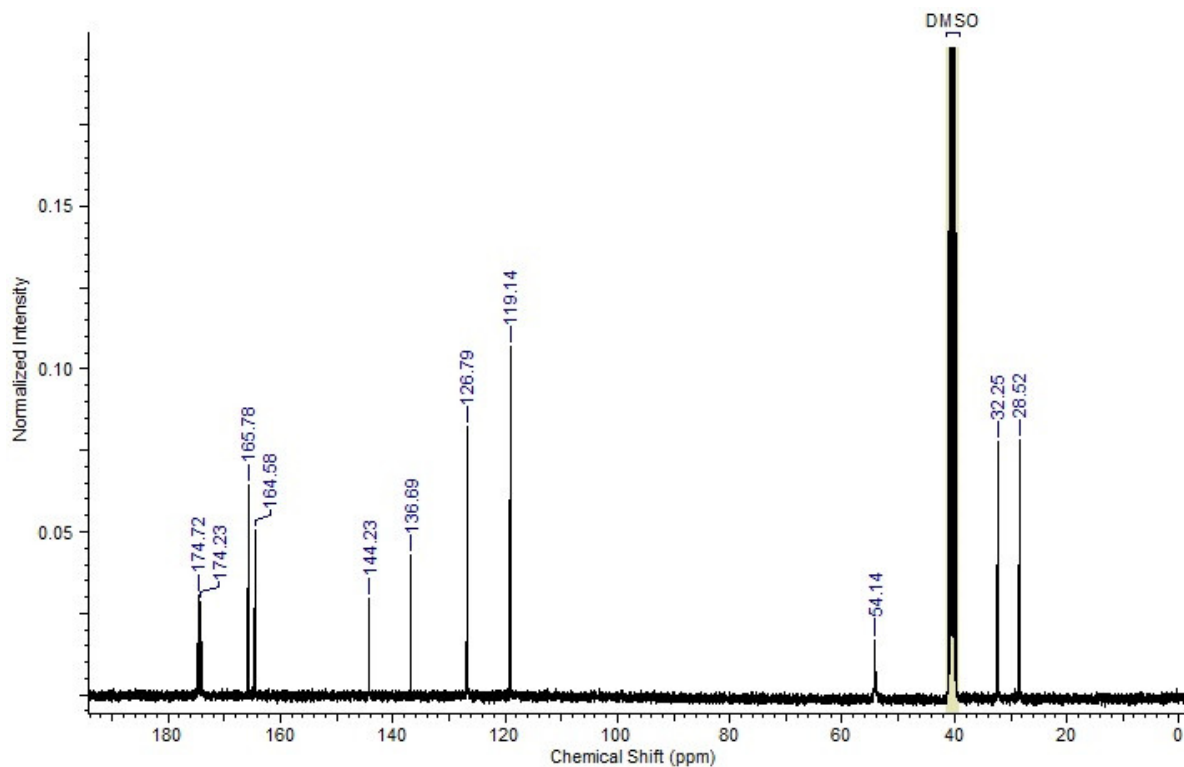

Figure S10c.  $^{13}\text{C}$  NMR spectra of product 11.

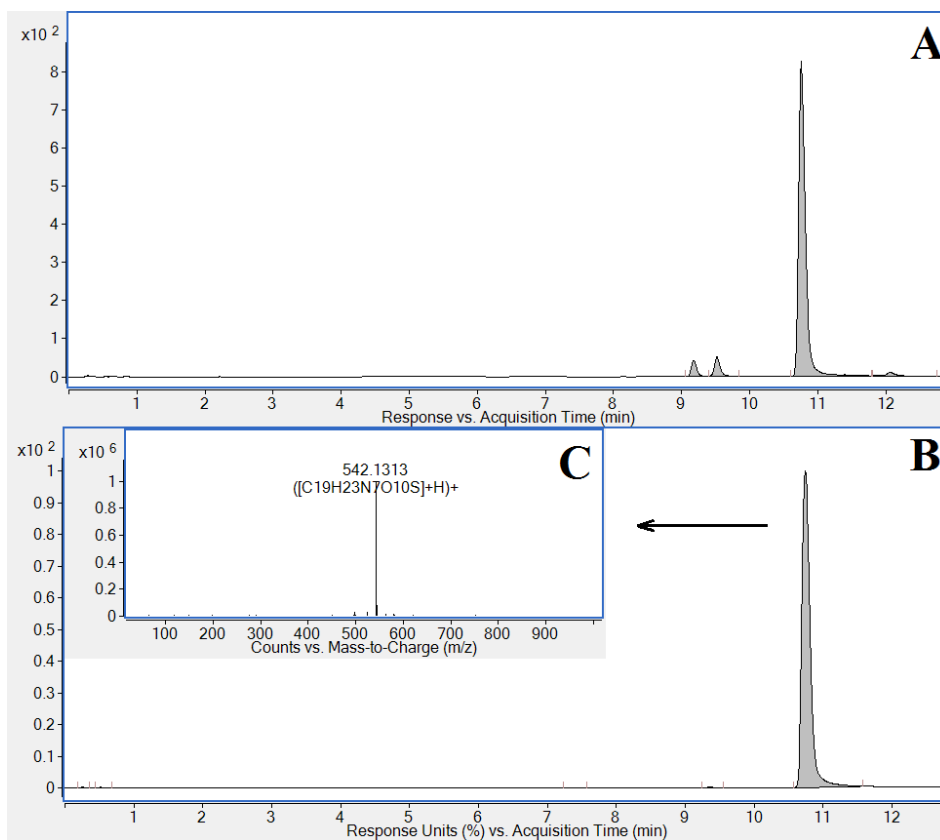

Figure S10d. HILIC-DAD-QTOF analysis of product 11. Purity profile (HILIC-DAD - 254 nm) before (panel A) and after (panel B) semi-preparative chromatography. Panel C – MS spectrum of the desired compound (the major peak from UV chromatogram).

## **S11. Selection of molecular descriptors**

Examining the molecular descriptors of the model can provide better understanding of the relation between the structure of the derivatives and their inhibitory capability against various hCAs. The values of inhibition against hCA I correlated mostly with *Edge adjacency indices* (7), namely SM05\_EA(dm), SM09\_EA(dm), SM07\_EA(dm), SM10\_AEA(ed), SM11\_EA(dm), SM08\_AEA(ed), and SM09\_AEA(ed); *Burden eigenvalues* (5), such as SpMax5\_Bh(s), SpMax4\_Bh(s), SpMax7\_Bh(s), SpMax8\_Bh(s), and SpMax6\_Bh(s); *2D autocorrelations* descriptor group (4), namely ATSC1s, ATSC6e, ATSC3s, and ATSC4e; *2D matrix-based descriptors* (4), such as SpMAD\_H2, EE\_B(e), SM3\_B(e), and J\_D/Dt; *P\_VSA-like descriptors* (3), namely P\_VSA\_s\_6, P\_VSA\_m\_3, and P\_VSA\_e\_5; *Constitutional indices* (2 - nO and nDB); GETAWAY descriptors (2 - HATSm and R3s); and 3 descriptors from other groups (*Atom-type E-state indices* - SsCH2, *Geometrical descriptors* - QYYi, and *Information indices* - SIC5). The only selected *Geometrical descriptor*, QYYi, showed highest significance among the selected descriptors according to their *p*-value.

In case of hCA II inhibition, the most influential descriptors belonged to *2D autocorrelations* group (10), namely ATS5p, ATSC7p, ATS7p, ATS8e, ATSC8i, MATS5s, ATS7v, ATS3v, GATS1p, and ATS4p; *2D matrix-based descriptors* (7), specifically SM3\_B(m), SM4\_B(m), SM5\_B(i), SM2\_B(s), SM5\_B(m), SM4\_B(i), and SM5\_B(e); *RDF descriptors* (7), namely RDF015u, RDF015m, RDF015v, RDF120i, RDF110v, RDF015p, and RDF120e; *Charge descriptors* (3), such as TE2, PCWTE2 and Qneg; and 3 descriptors from other groups (*Connectivity indices* - X1v, *Topological indices* - ZM1MulPer, and *WHIM descriptors* - G1u).

With respect to the hCA IV, the biggest group of significant variables consisted of *2D autocorrelations* (9), namely ATSC5i, ATSC6i, ATSC7v, ATS1p, ATSC8m, ATS2p, ATSC7i, ATSC1s, and ATSC5p; followed by *Edge adjacency indices* (7), such as Chi0\_EA(ed), Chi1\_EA(ed), Eig06\_EA(dm), SM14\_AEA(ed), SM15\_AEA(ed), SM02\_EA(bo), and Eig02\_AEA(ed); *3D-MoRSE descriptors* (4), namely Mor26u, Mor26e, Mor26p, and Mor05u; *2D matrix-based descriptors* (3), such as WiA\_B(s), EE\_B(s), and SM4\_B(e); *3D autocorrelations* (2 - TDB08s and TDB10s); *Charge descriptors* (2 - Qneg and Q2); and 3 descriptors belonging to *Burden eigenvalues* (SpMin3\_Bh(s)), *ETA indices* (Eta\_beta) or *P\_VSA-like descriptors* (P\_VSA\_LogP\_4) group.

Inhibition values against hCA IX correlated mostly with *2D matrix-based descriptors* (7), specifically with SM4\_L, SM1\_Dz(v), SM5\_H2, EE\_L, SM5\_L, SM1\_Dz(i), and SM1\_Dz(p); followed by group of *2D matrix-based descriptors* (6), namely P\_VSA\_s\_3, P\_VSA\_m\_4, P\_VSA\_MR\_8, P\_VSA\_MR\_6, P\_VSA\_LogP\_1, and P\_VSA\_i\_1; *2D autocorrelations* (3), such as GATS2m, MATS5m, and GATS4i; *Constitutional indices* (3), such as nHM, H% and nS; *GETAWAY descriptors* (3), namely R1i+, RTi+, and HATS3i; *3D-MoRSE descriptors* (2 - Mor30v and Mor32p); *Edge adjacency indices* (2 - SM02\_EA(ri) and SM06\_EA(dm)); *Walk and path counts* (2 - MWC06 and SRW06); and 2 descriptors belonging either to *Atom-type E-state indices* (SsCH3) or *Connectivity indices* (X2A) group.

The list of thirty most important molecular descriptors obtained by feature selection in Statistica 12 is in Table ST1. It was found out that a group of 2D autocorrelations as well as 2D matrix-based descriptors appeared to be most significant with respect to inhibitory activity of the sulfonamide derivatives against the all selected human carbonic anhydrases.

**Table ST2.** The list of thirty most important molecular descriptors obtained by feature selection in Statistica 12 (sorted by p).

|    | HCA1              |                |                | HCA2              |                |                | HCA4              |                |                | HCA9              |                |                |
|----|-------------------|----------------|----------------|-------------------|----------------|----------------|-------------------|----------------|----------------|-------------------|----------------|----------------|
|    | <i>descriptor</i> | <i>F-value</i> | <i>p-value</i> | <i>descriptor</i> | <i>F-value</i> | <i>p-value</i> | <i>descriptor</i> | <i>F-value</i> | <i>p-value</i> | <i>descriptor</i> | <i>F-value</i> | <i>p-value</i> |
| 1  | QYyi              | 7,3116         | 0,0001         | ATS5p             | 11,0889        | 0,0000         | Chi0_EA(ed)       | 28,8598        | 0,0000         | SM5_H2            | 11,2717        | 0,0001         |
| 2  | ATSC6e            | 7,3167         | 0,0002         | ATSC7p            | 9,5183         | 0,0000         | ATSC7v            | 9,5817         | 0,0000         | Mor30v            | 7,0422         | 0,0002         |
| 3  | SIC5              | 7,0046         | 0,0002         | SM3_B(m)          | 9,3779         | 0,0000         | WiA_B(s)          | 8,5311         | 0,0000         | P_VSA_s_3         | 8,2497         | 0,0002         |
| 4  | HATSm             | 6,4293         | 0,0003         | SM4_B(m)          | 9,3765         | 0,0000         | ATS1p             | 8,0214         | 0,0001         | GATS2m            | 8,1202         | 0,0002         |
| 5  | ATSC3s            | 8,9179         | 0,0003         | ATS7p             | 8,5800         | 0,0000         | Chi1_EA(ed)       | 13,9609        | 0,0001         | MATS5m            | 6,5890         | 0,0003         |
| 6  | SpMax5_Bh(s)      | 15,7803        | 0,0005         | ATS8e             | 8,3655         | 0,0000         | Mor26u            | 8,3370         | 0,0001         | R1i+              | 6,5433         | 0,0003         |
| 7  | SpMax4_Bh(s)      | 15,7803        | 0,0005         | SM5_B(i)          | 8,6997         | 0,0001         | Eig06_EA(dm)      | 8,2965         | 0,0002         | RTi+              | 6,5433         | 0,0003         |
| 8  | P_VSA_s_6         | 15,7803        | 0,0005         | SM5_B(m)          | 9,0580         | 0,0001         | SM14_AEA(ed)      | 9,4207         | 0,0002         | H%                | 6,2709         | 0,0003         |
| 9  | SpMax7_Bh(s)      | 15,7803        | 0,0005         | TE2               | 9,7554         | 0,0001         | SM15_AEA(ed)      | 9,4207         | 0,0002         | GATS4i            | 6,1352         | 0,0004         |
| 10 | nO                | 15,7803        | 0,0005         | PCWTE2            | 9,7554         | 0,0001         | ATSC8m            | 6,5963         | 0,0002         | P_VSA_m_4         | 16,1143        | 0,0004         |
| 11 | SpMax8_Bh(s)      | 15,7803        | 0,0005         | SM4_B(i)          | 7,1348         | 0,0002         | TDB08s            | 6,9606         | 0,0003         | nHM               | 16,1143        | 0,0004         |
| 12 | SM11_EA(dm)       | 15,7803        | 0,0005         | RDF015u           | 6,3052         | 0,0003         | P_VSA_LogP_4      | 8,9909         | 0,0003         | P_VSA_i_1         | 16,1143        | 0,0004         |
| 13 | P_VSA_m_3         | 15,7803        | 0,0005         | GATS1p            | 7,6810         | 0,0004         | ATS2p             | 6,4124         | 0,0003         | nS                | 16,1143        | 0,0004         |
| 14 | SpMax6_Bh(s)      | 15,7803        | 0,0005         | ATS4p             | 6,0580         | 0,0004         | ATSC7i            | 6,4584         | 0,0003         | P_VSA_MR_8        | 16,1143        | 0,0004         |
| 15 | SM05_EA(dm)       | 15,7803        | 0,0005         | ATSC8i            | 6,0386         | 0,0004         | Eta_beta          | 8,7581         | 0,0003         | MWC06             | 7,1681         | 0,0005         |
| 16 | P_VSA_e_5         | 15,7803        | 0,0005         | G1u               | 6,1782         | 0,0004         | SM4_B(e)          | 6,3841         | 0,0004         | SM02_EA(ri)       | 6,1839         | 0,0006         |
| 17 | SM09_EA(dm)       | 15,7803        | 0,0005         | RDF015m           | 5,4975         | 0,0008         | Mor26e            | 6,5431         | 0,0004         | SM4_L             | 6,5256         | 0,0006         |
| 18 | SM07_EA(dm)       | 15,7803        | 0,0005         | SM2_B(s)          | 5,9756         | 0,0010         | SM02_EA(bo)       | 6,9030         | 0,0004         | SRW06             | 6,1308         | 0,0006         |
| 19 | nDB               | 15,7803        | 0,0005         | RDF015v           | 5,2214         | 0,0011         | Mor26p            | 6,4661         | 0,0004         | Mor32p            | 6,0936         | 0,0006         |
| 20 | SpMAD_H2          | 6,7328         | 0,0005         | RDF120i           | 5,6287         | 0,0014         | SpMin3_Bh(s)      | 7,4305         | 0,0004         | EE_L              | 5,4618         | 0,0012         |
| 21 | ATSC1s            | 8,1282         | 0,0006         | SM5_B(e)          | 5,5330         | 0,0016         | ATSC1s            | 8,4014         | 0,0005         | HATS3i            | 5,0867         | 0,0013         |
| 22 | EE_B(e)           | 5,8219         | 0,0007         | ZM1MulPer         | 5,1973         | 0,0017         | EE_B(s)           | 10,2842        | 0,0005         | SM5_L             | 5,6515         | 0,0014         |
| 23 | SM3_B(e)          | 5,8219         | 0,0007         | MATS5s            | 4,9765         | 0,0017         | Qneg              | 7,2720         | 0,0005         | X2A               | 5,1785         | 0,0017         |
| 24 | R3s               | 5,7348         | 0,0007         | RDF110v           | 5,4295         | 0,0018         | ATSC5p            | 6,0413         | 0,0005         | P_VSA_MR_6        | 8,0756         | 0,0018         |
| 25 | SssCH2            | 5,6636         | 0,0008         | RDF015p           | 4,7808         | 0,0019         | Eig02_AEA(ed)     | 7,0593         | 0,0006         | P_VSA_LogP_1      | 7,9190         | 0,0020         |
| 26 | SM10_AEA(ed)      | 5,8418         | 0,0008         | ATS7v             | 4,7827         | 0,0022         | TDB10s            | 6,4828         | 0,0006         | SsCH3             | 7,9190         | 0,0020         |
| 27 | SM08_AEA(ed)      | 5,8418         | 0,0008         | Qneg              | 5,6513         | 0,0022         | Mor05u            | 5,8840         | 0,0006         | SM1_Dz(i)         | 7,8971         | 0,0020         |
| 28 | SM09_AEA(ed)      | 5,8418         | 0,0008         | RDF120e           | 4,8217         | 0,0025         | ATSC5i            | 5,8447         | 0,0006         | SM1_Dz(p)         | 7,8971         | 0,0020         |
| 29 | J_D/Dt            | 6,1034         | 0,0009         | ATS3v             | 4,6015         | 0,0027         | ATSC6i            | 5,8203         | 0,0007         | SM1_Dz(v)         | 7,8971         | 0,0020         |
| 30 | ATSC4e            | 6,0330         | 0,0009         | X1v               | 4,5865         | 0,0027         | Q2                | 6,9602         | 0,0007         | SM06_EA(dm)       | 7,8971         | 0,0020         |
